# Supplementary material for: Identification of stable QTLs for vegetative and reproductive traits in the microvine (Vitis vinifera L.) using the 18 K Infinium chip
Source: PubMed Central journal article supplement (PMC4539925; doi:10.1186/s12870-015-0588-0), 2015-08-19

**Figure S1. Phenotypic data distribution for the 43 traits under different growth conditions.** When the best model to estimate the BLUPs of genetic values of trait did not included a copy effect, the means of the trait (M) was shown. Otherwise, the distributions of the two separate copies (copy1, copy2) were shown (copy1, copy2).

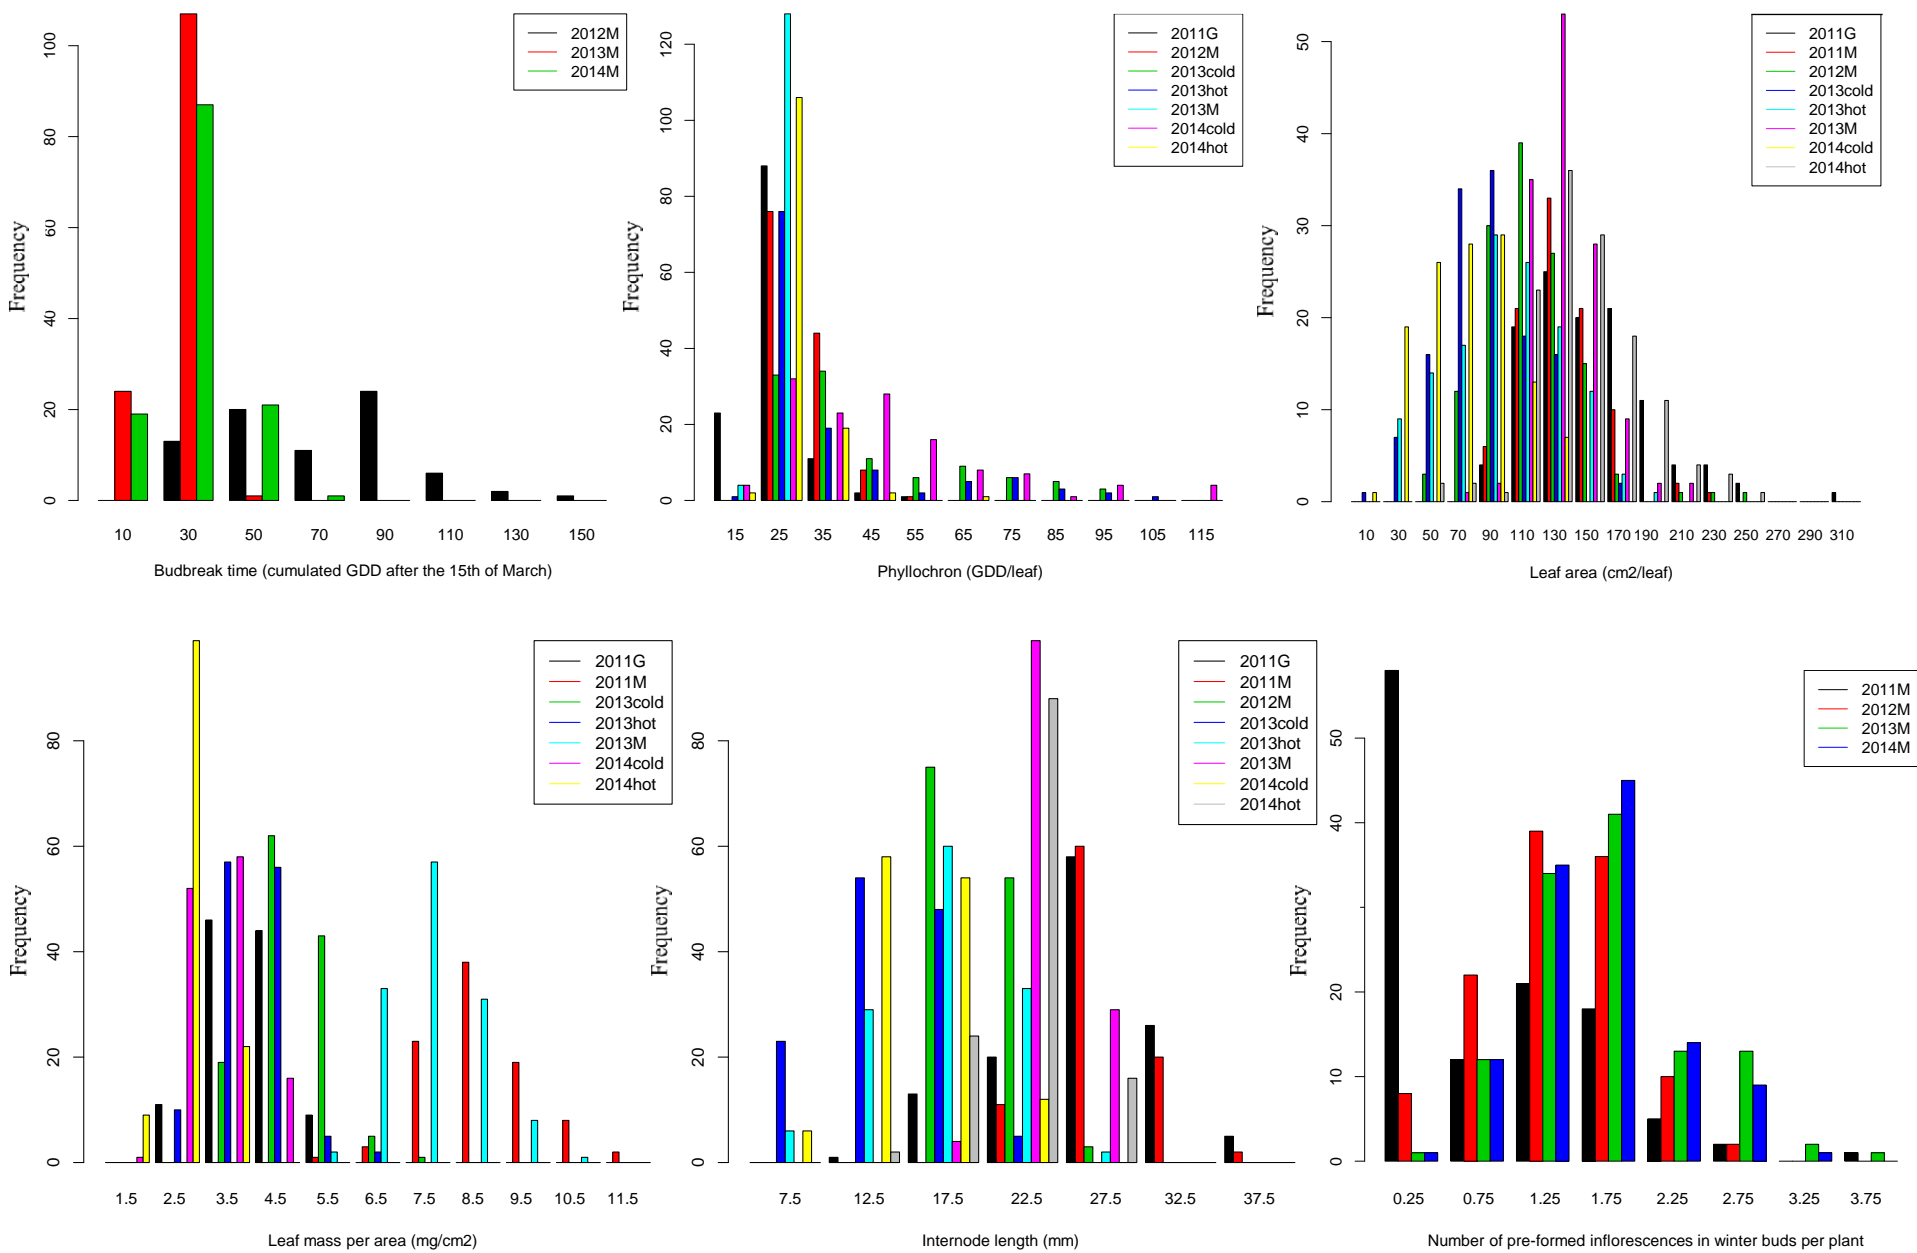

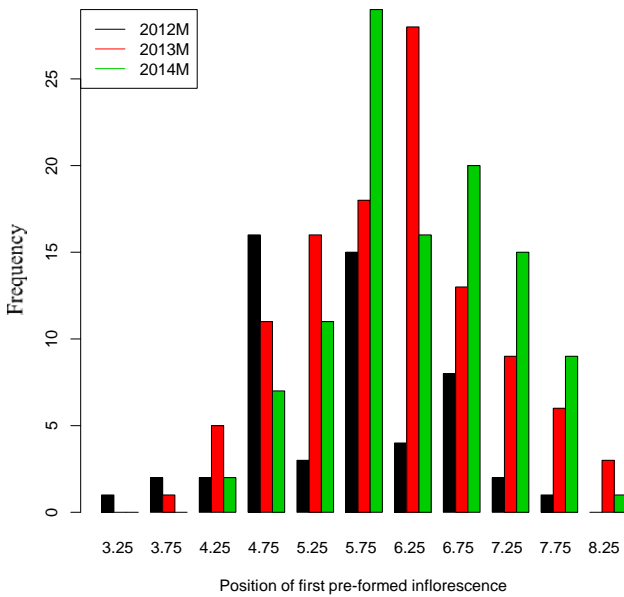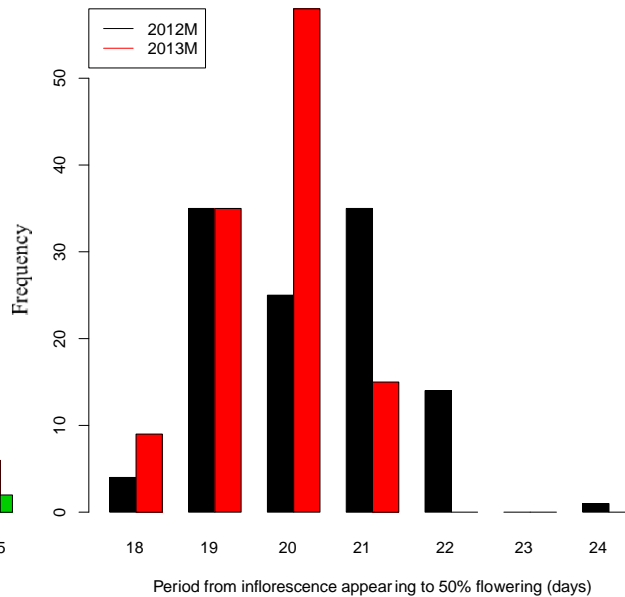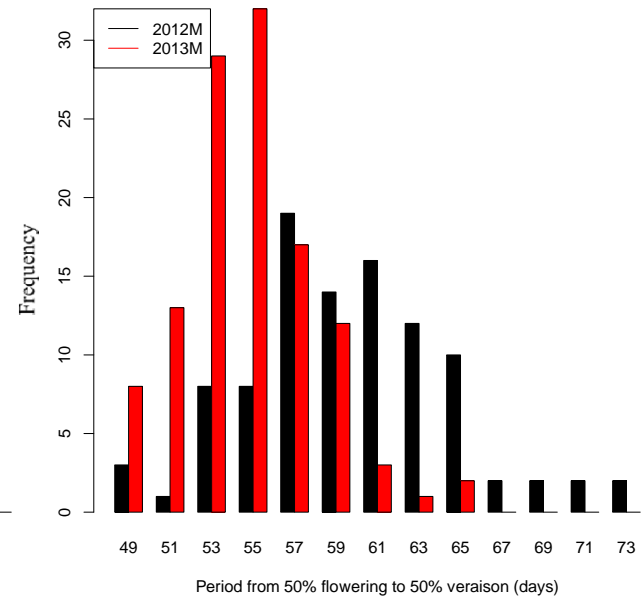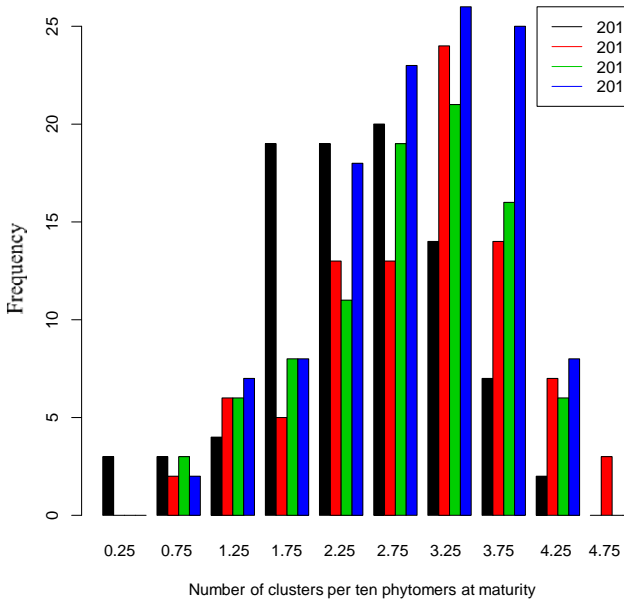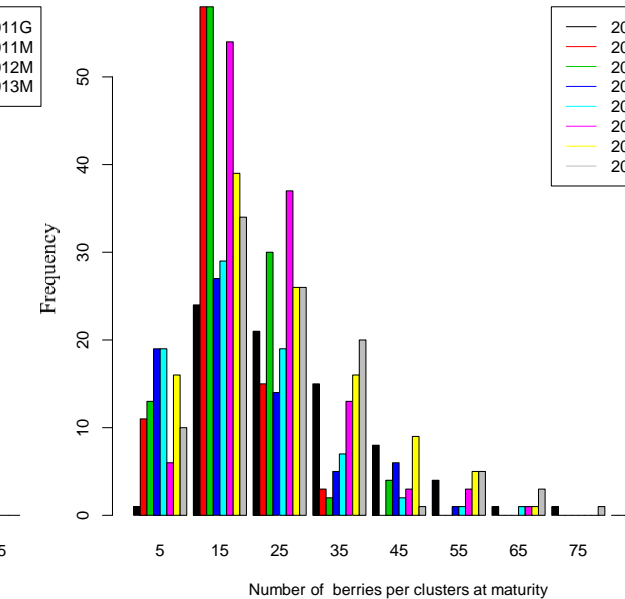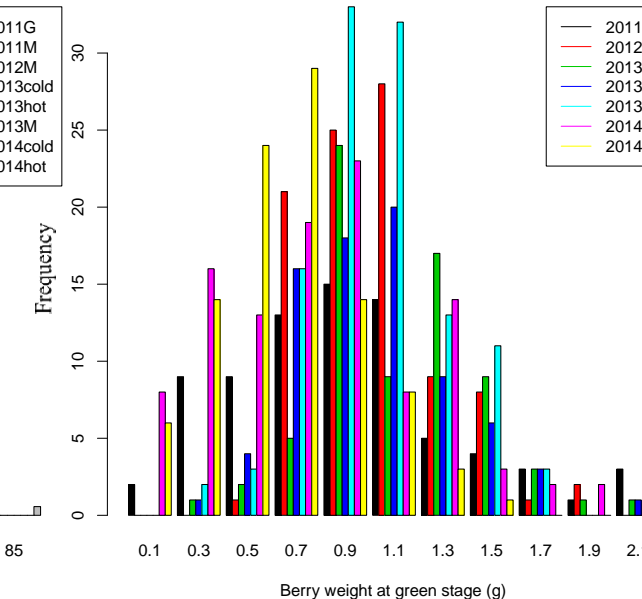

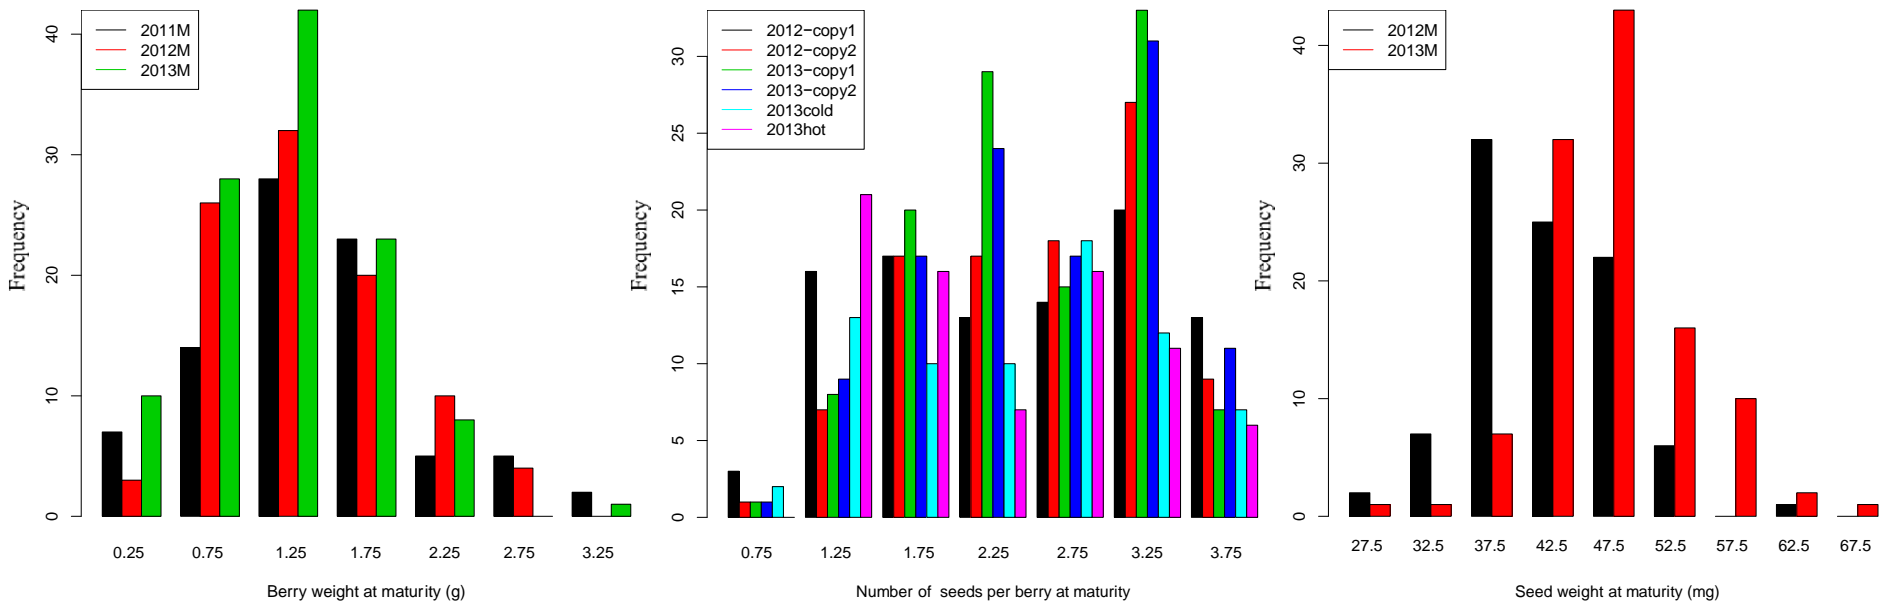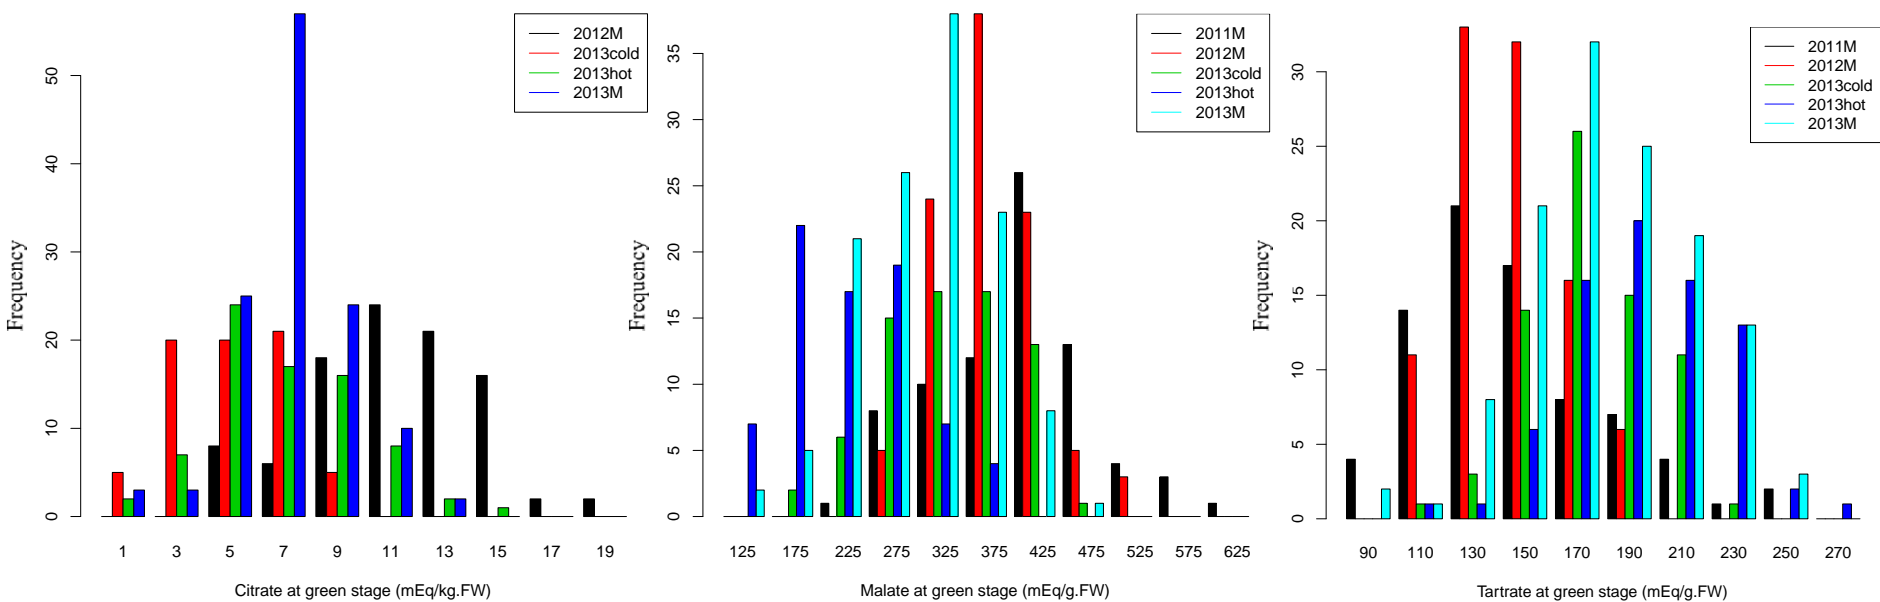

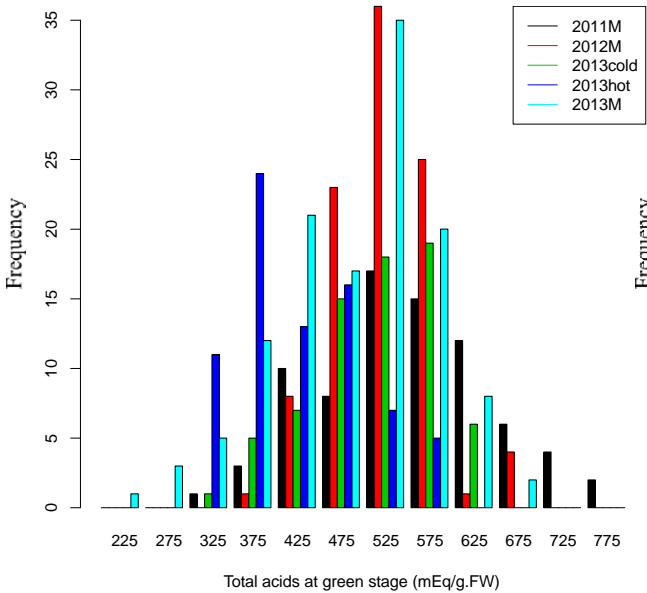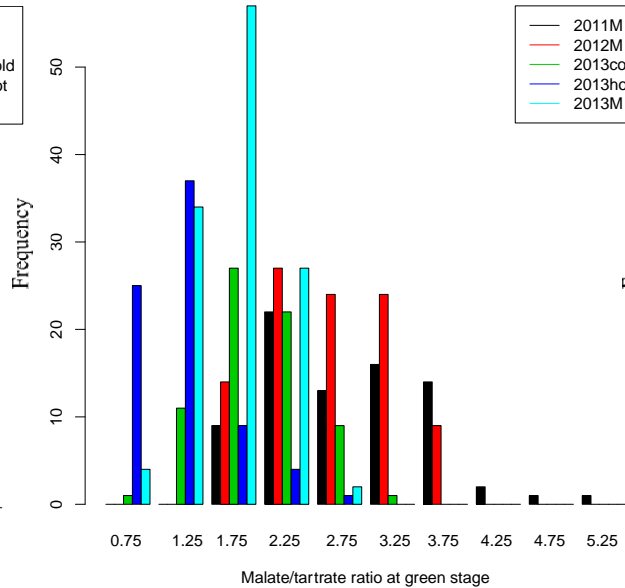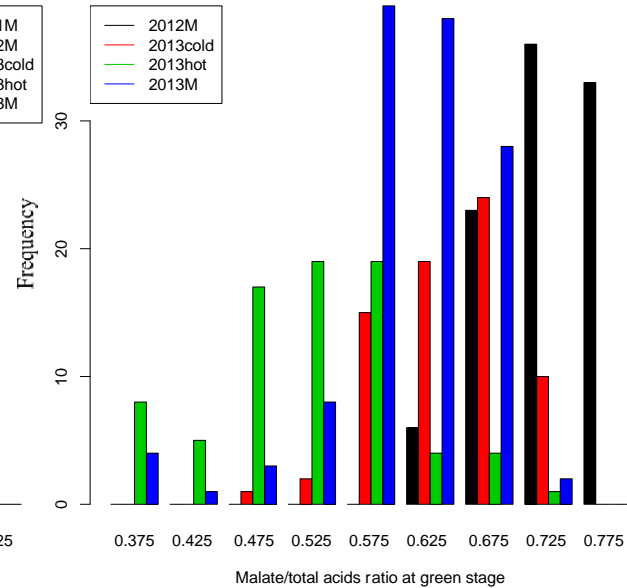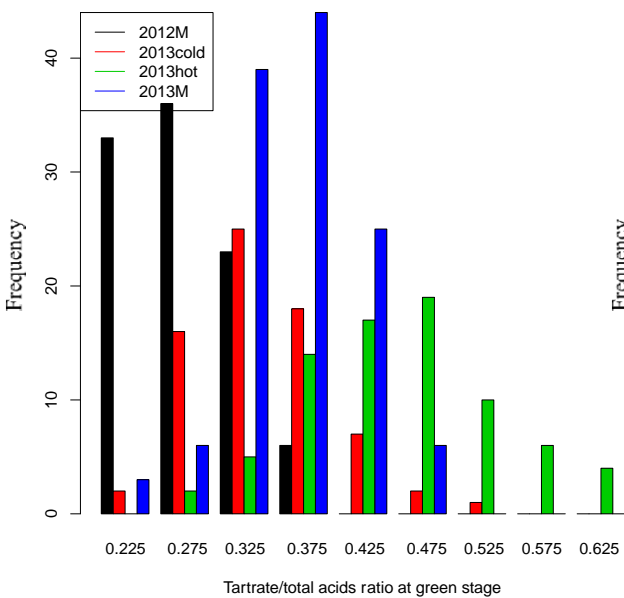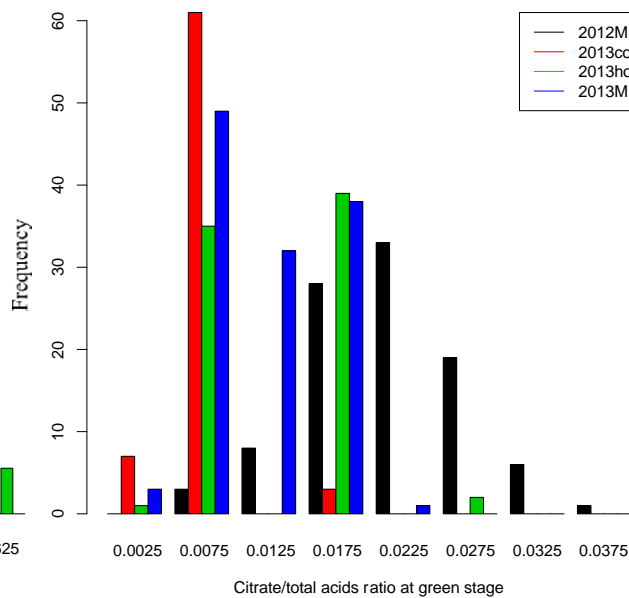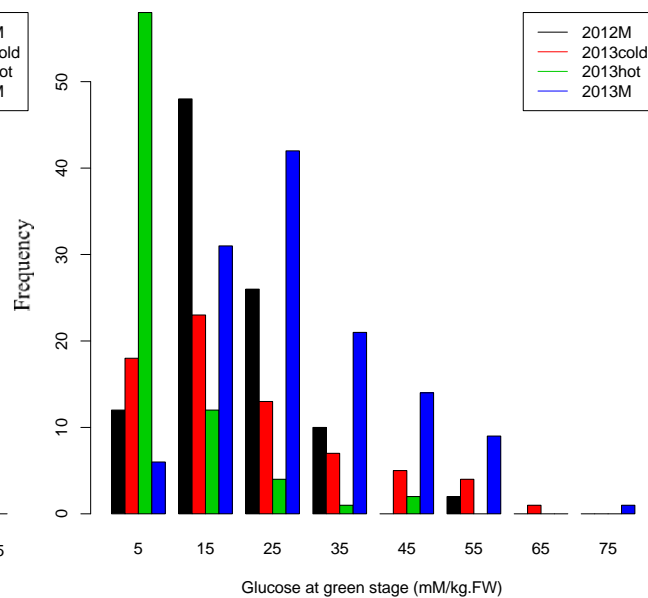

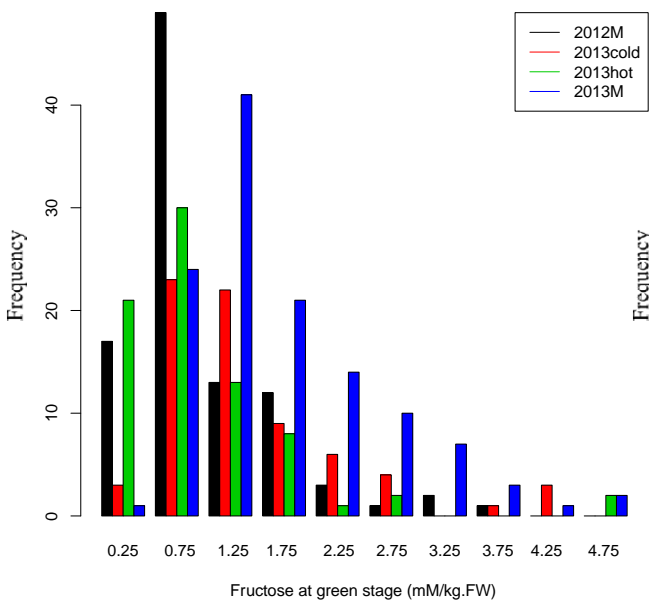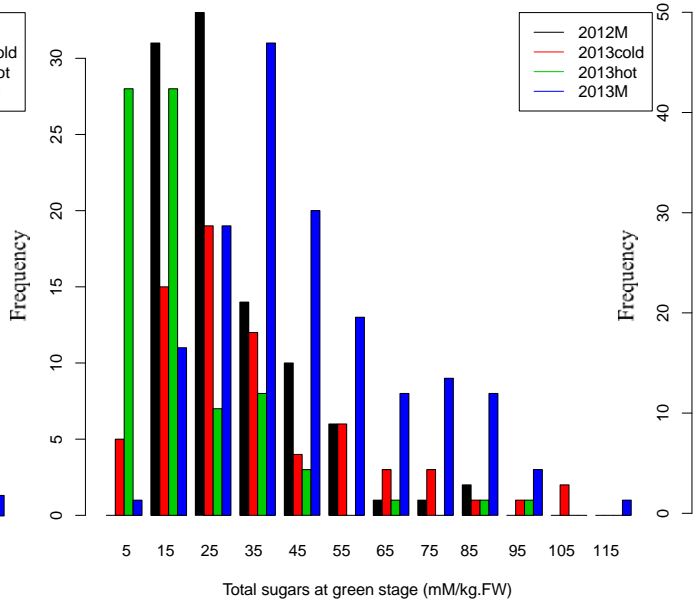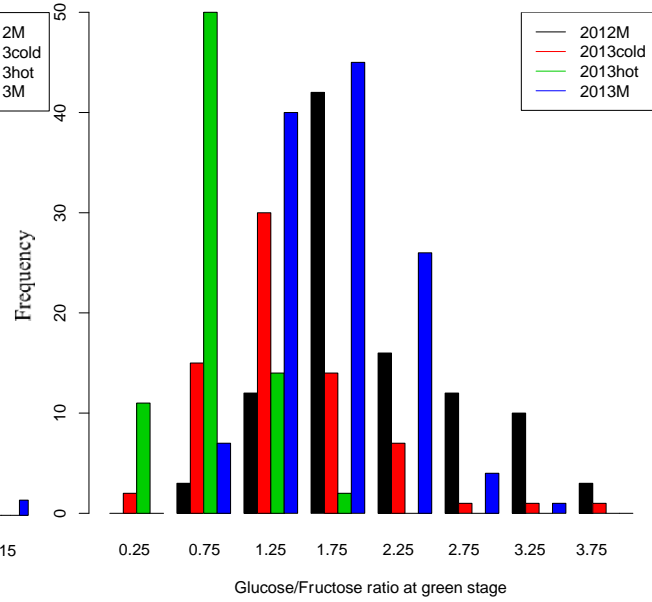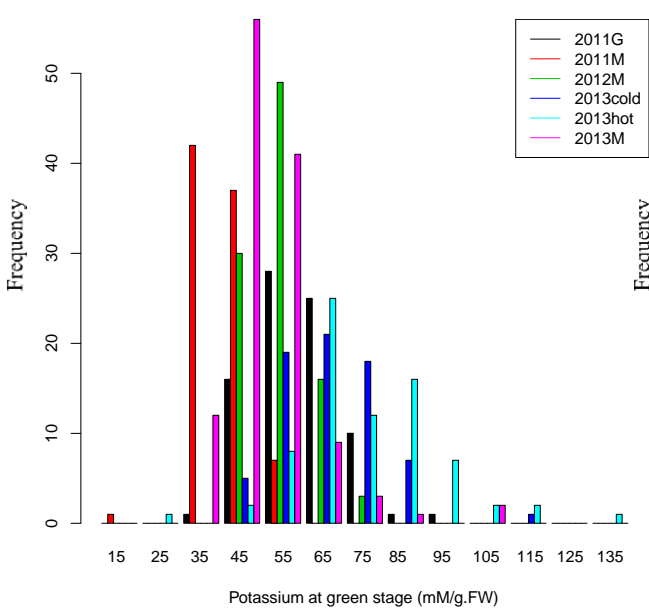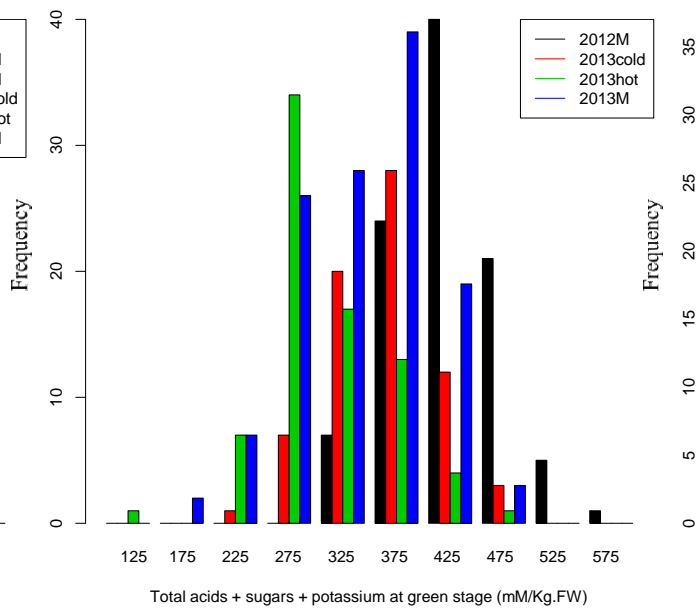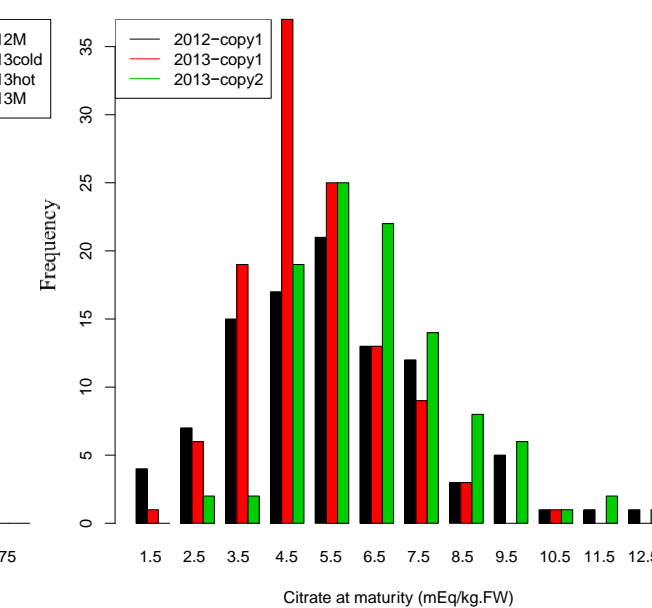

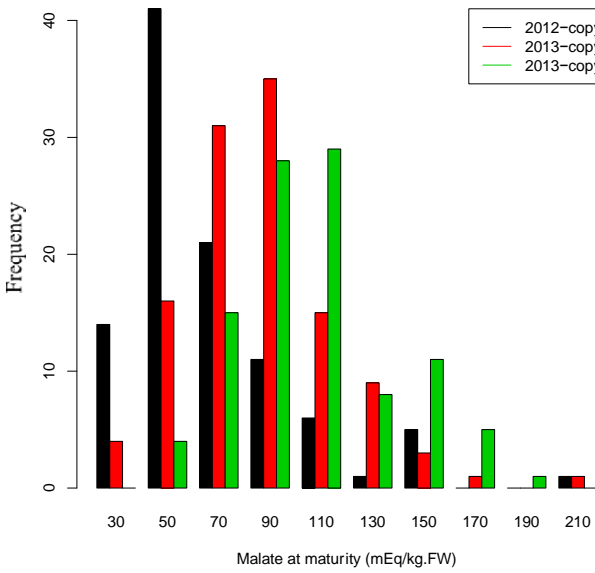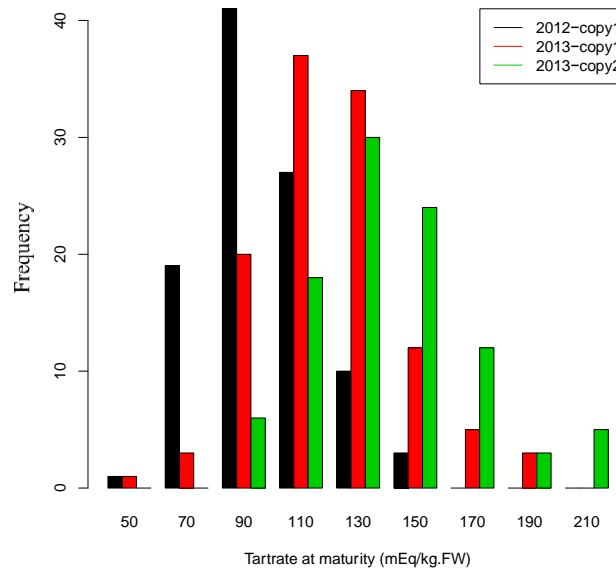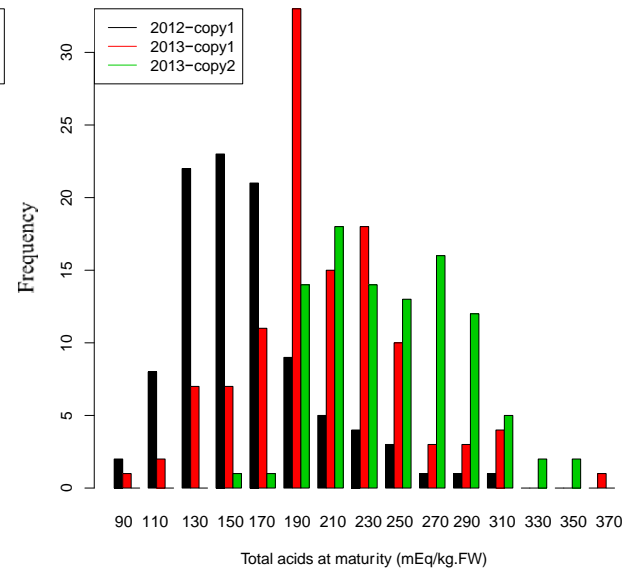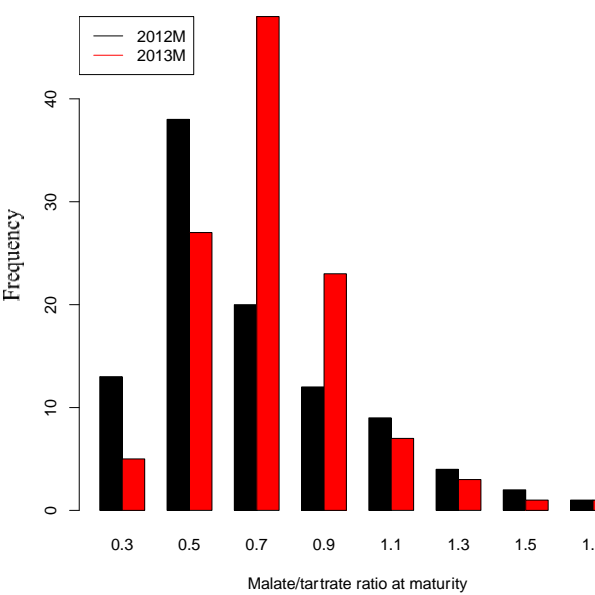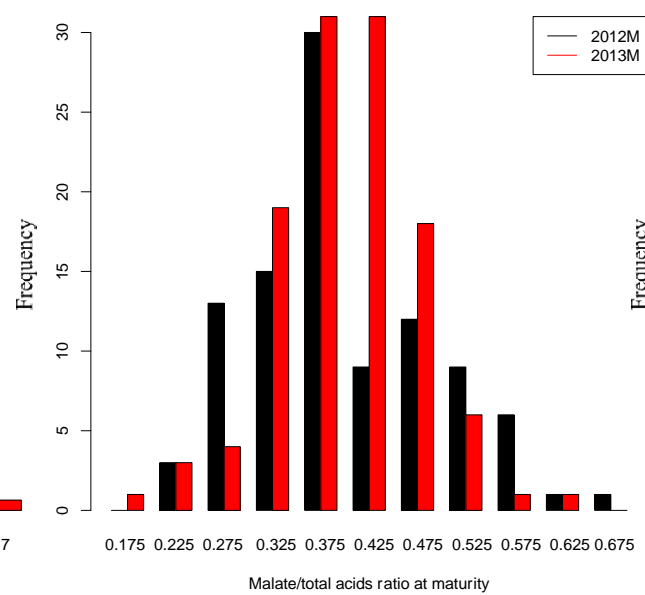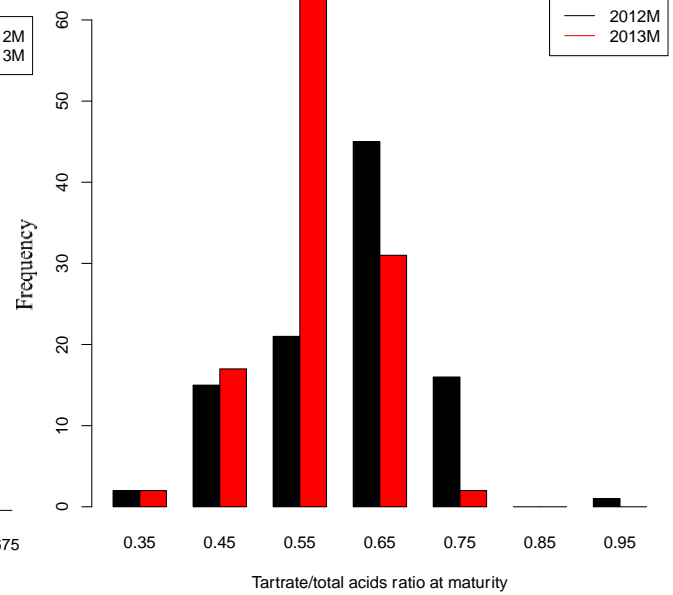

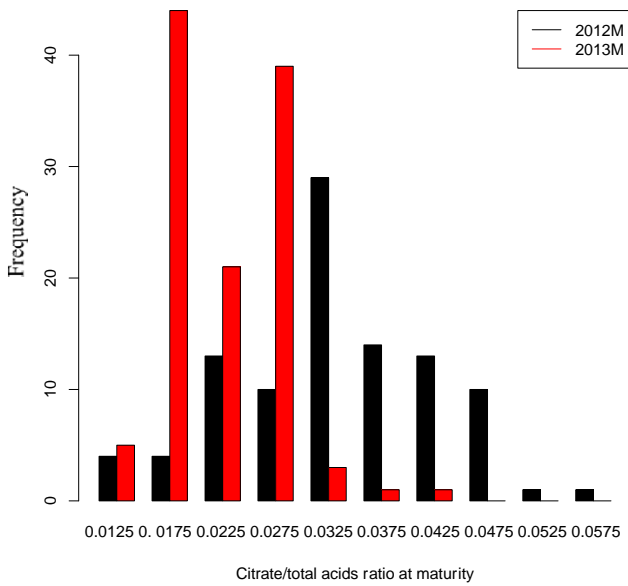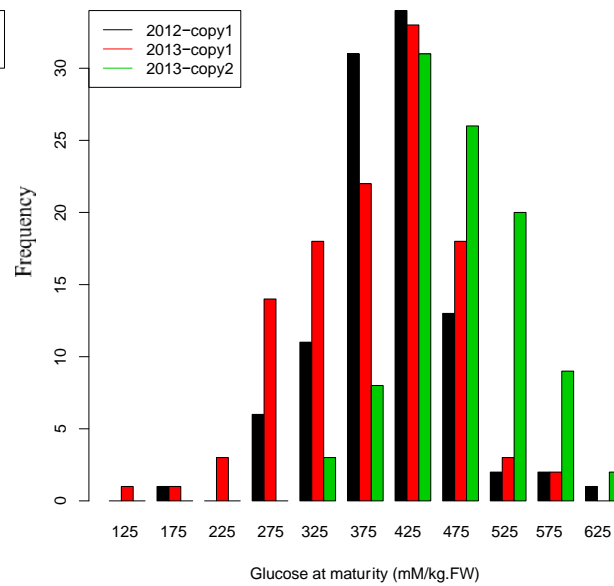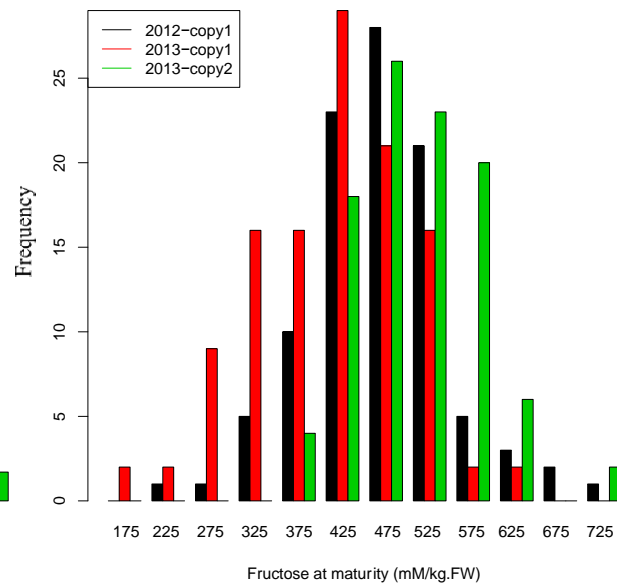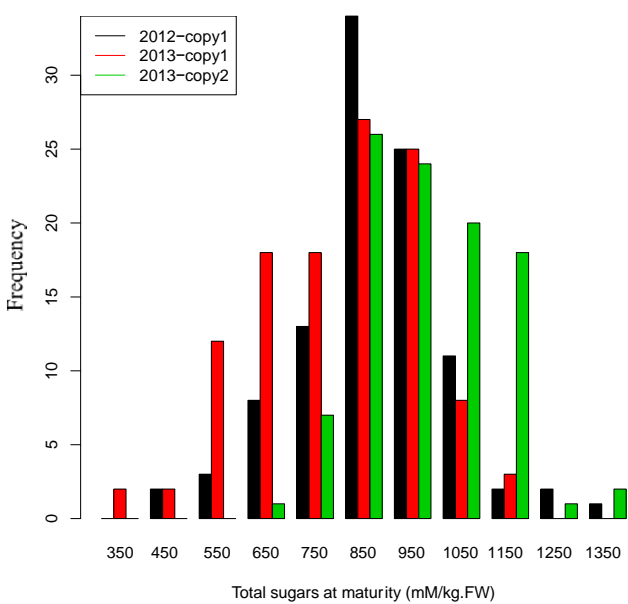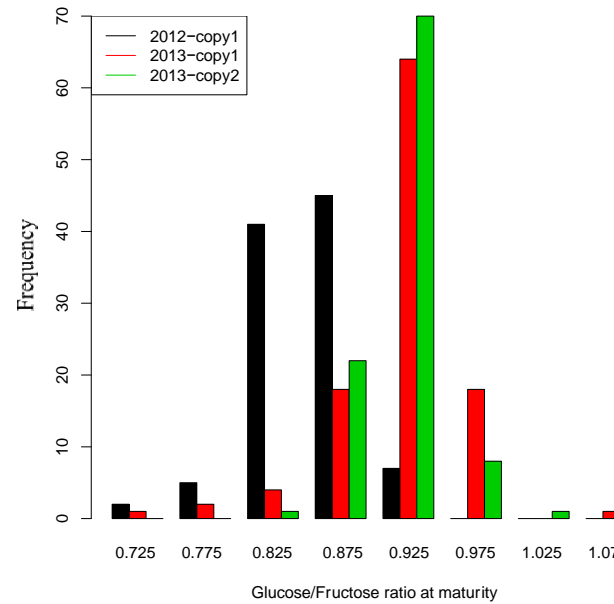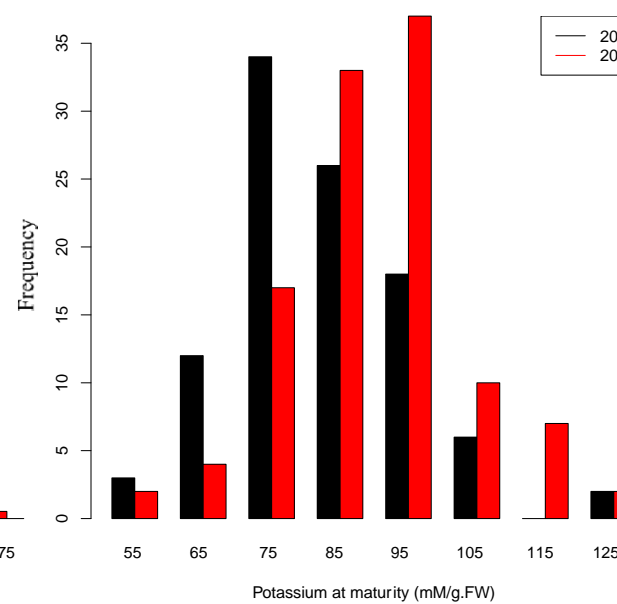

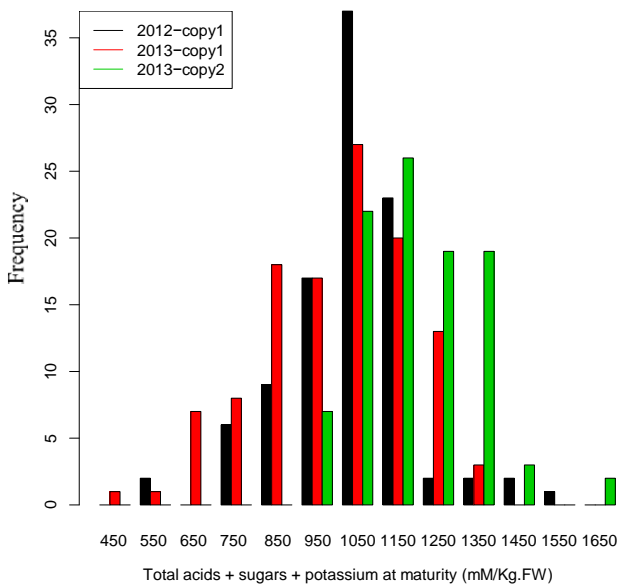

Supplement: 12870_2015_588_MOESM1_ESM.pdf [file 12870_2015_588_MOESM1_ESM.pdf]
