# Supplementary material for: Identification of stable QTLs for vegetative and reproductive traits in the microvine (Vitis vinifera L.) using the 18 K Infinium chip
Source: PubMed Central journal article supplement (PMC4539925; doi:10.1186/s12870-015-0588-0), 2015-08-19

**LA\_chr4**

- Cell replication
- Hormonal regulation
- Leaf morphogenesis
- Cell wall modifications
- Transcription factors

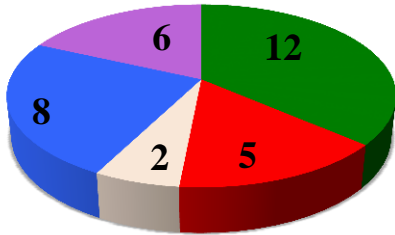**LA\_chr19**

- Cell replication
- Hormonal regulation
- Leaf morphogenesis
- Cell wall modifications
- Transcription factors

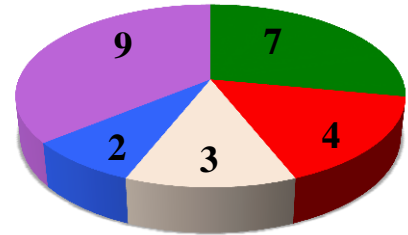**BWG\_chr7**

- Cell replication
- Hormonal regulation
- Primary metabolism
- Cell wall modifications
- Transcription factors

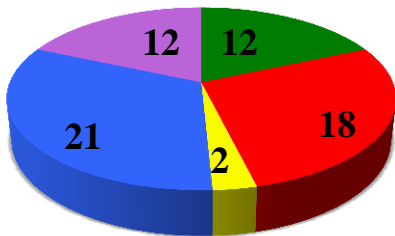**BWM\_chr7**

- Cell replication
- Hormonal regulation
- Primary metabolism
- Cell wall modifications
- Transcription factors

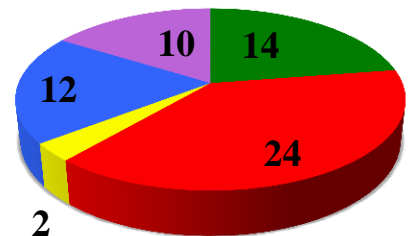**NB\_chr7**

- Hormonal regulation
- Flower morphogenesis
- Transcription factors

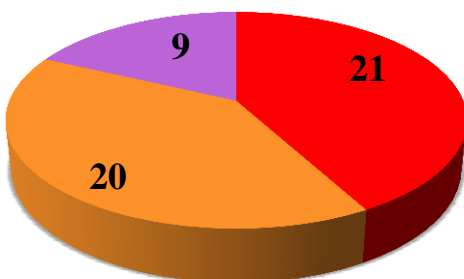**NB\_chr14**

- Hormonal regulation
- Flower morphogenesis
- Transcription factors

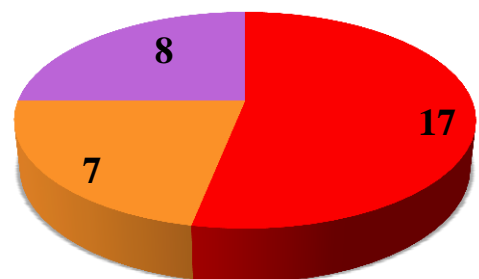

### NC\_chr7

- Hormonal regulation
- Transcription factors
- Conversion inflorescence vs tendril

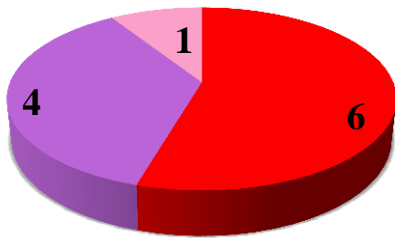

### NS\_chr7

- Hormonal regulation
- Transcription factors
- Embryo and seed development

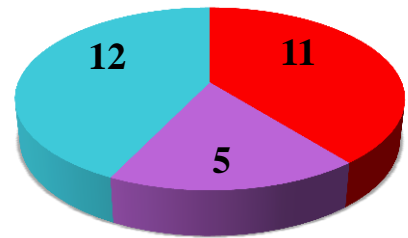

### TaG\_chr4

- Primary metabolism
- Transcription factor
- Vacuolar/membrane transport

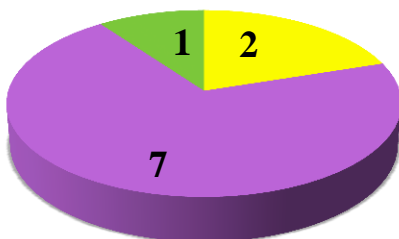

### TaG\_chr7

- Primary metabolism
- Transcription factor
- Vacuolar/membrane transport

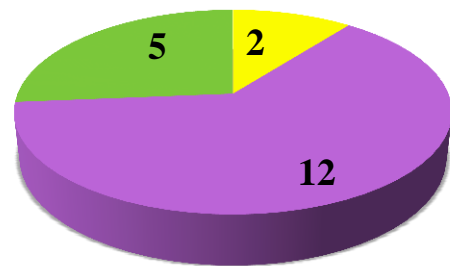

### TOG\_chr7

- Primary metabolism
- Transcription factor
- Vacuolar/membrane transport

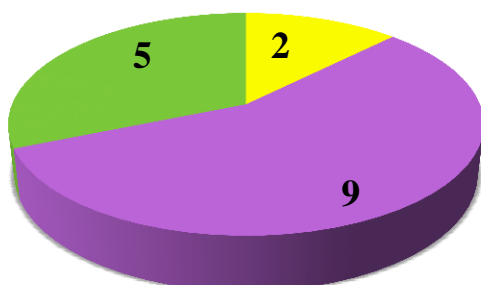

### MOG\_chr7

- Primary metabolism
- Transcription factor
- Vacuolar/membrane transport

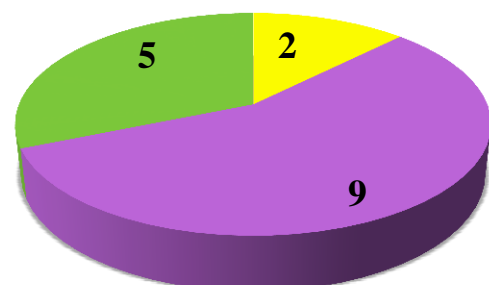

### MTG\_chr7

- Primary metabolism
- Transcription factor
- Vacuolar/membrane transport

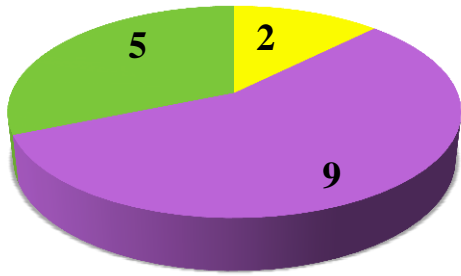

### TaG\_chr4

- Primary metabolism
- Transcription factor
- Vacuolar/membrane transport

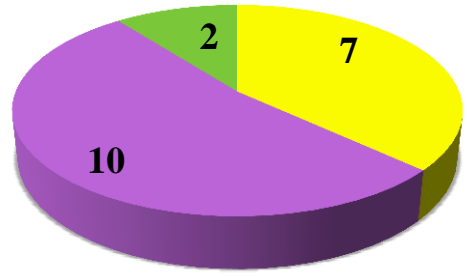

Supplement: 12870_2015_588_MOESM10_ESM.pdf [file 12870_2015_588_MOESM10_ESM.pdf]
