# Supplementary material for: Identification of stable QTLs for vegetative and reproductive traits in the microvine (Vitis vinifera L.) using the 18 K Infinium chip
Source: PubMed Central journal article supplement (PMC4539925; doi:10.1186/s12870-015-0588-0), 2015-08-19

**Figure S2.** Hierarchical classification of 43 traits under each growing condition.

When two copies of the same traits were measured under the same environment, the mean value of the two copies was used in order to simplify the tree. Different colours represent trait categories for which a stable QTL was identified.

### Hierarchical classification of 2011 greenhouse traits

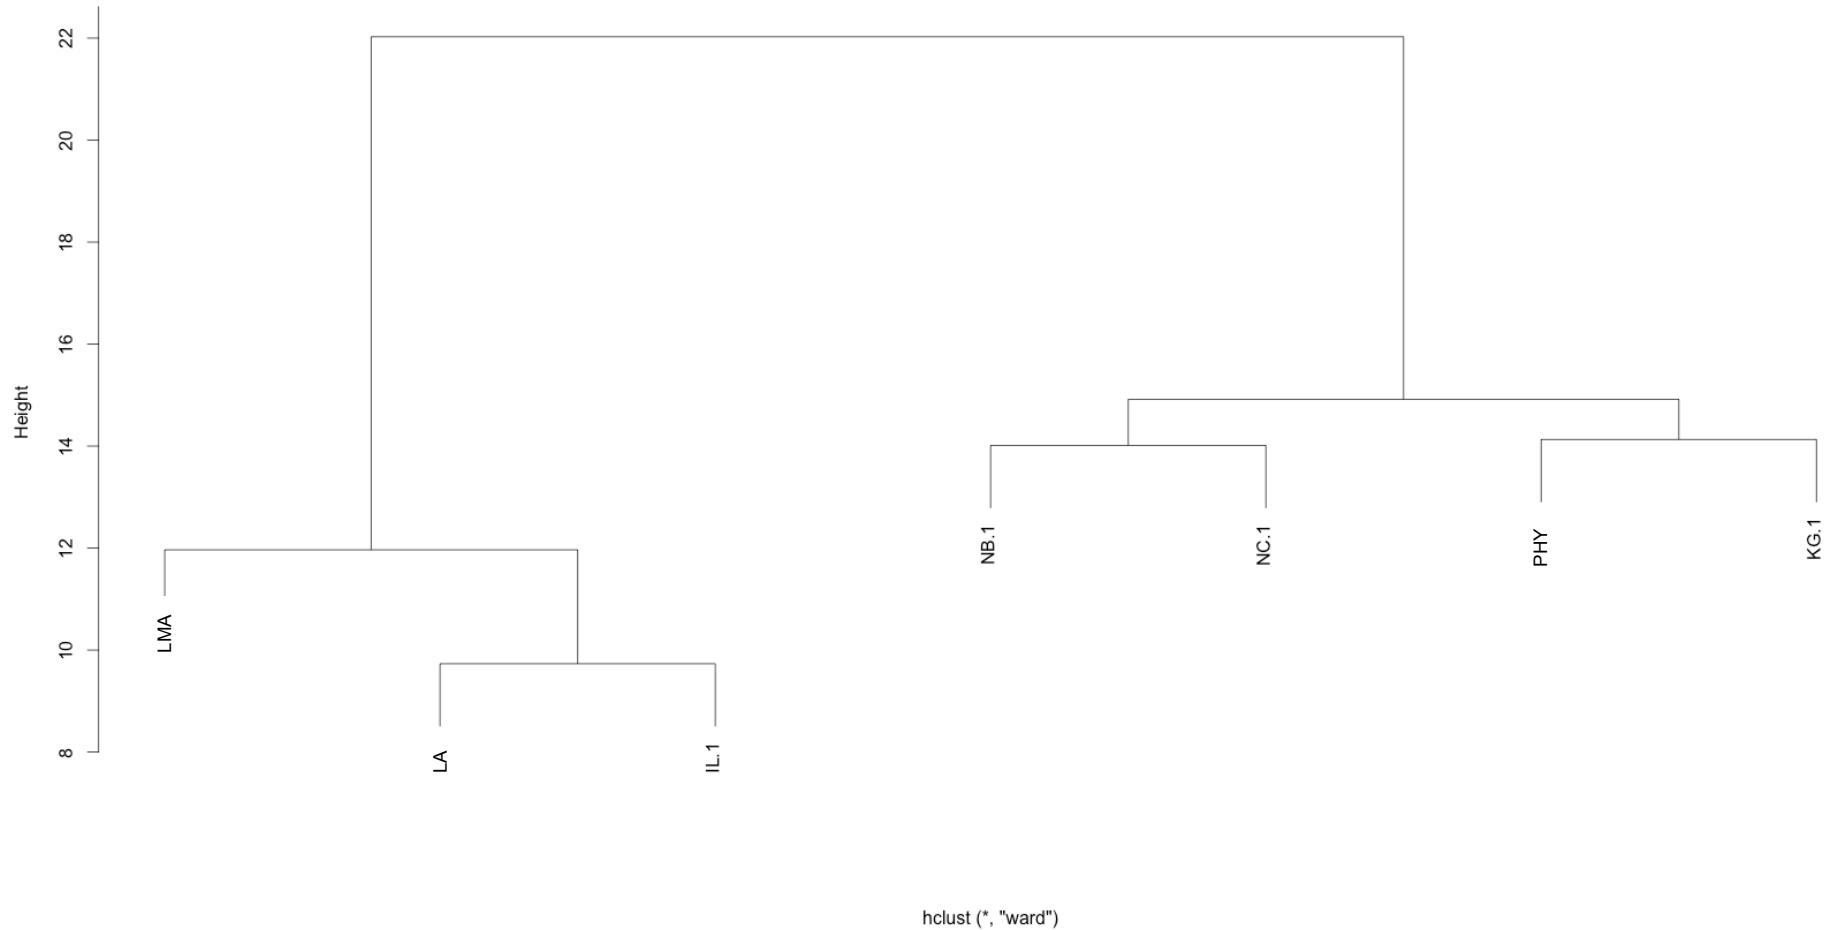

# Hierarchical classification of 2011 outdoors traits

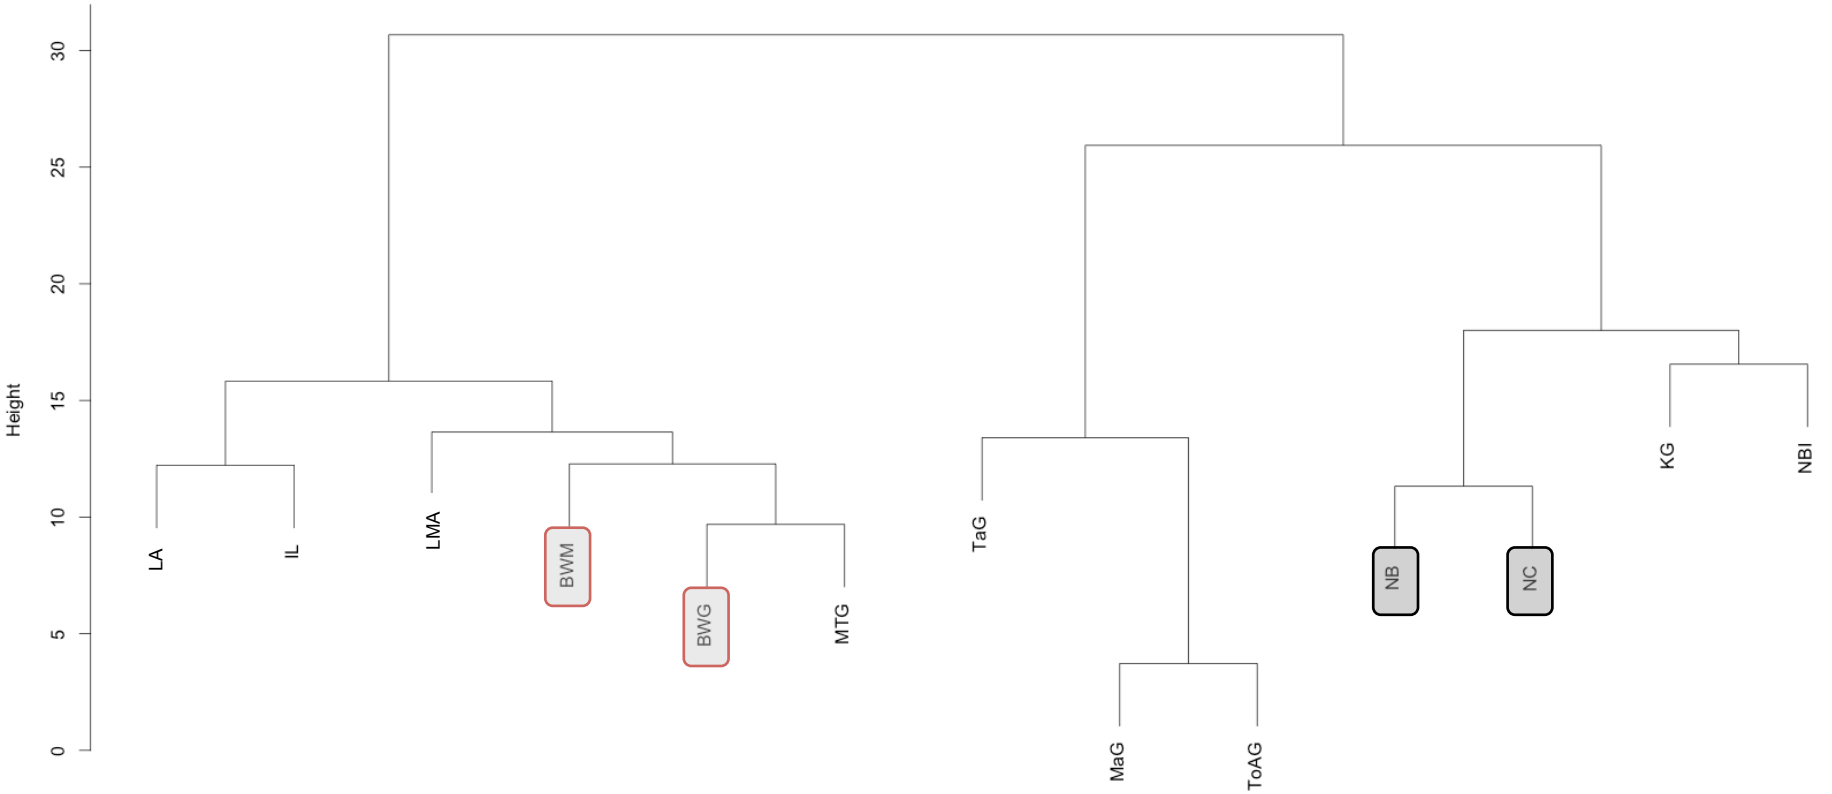

hclust (\*, "ward")

# Hierarchical classification of 2012 outdoors traits

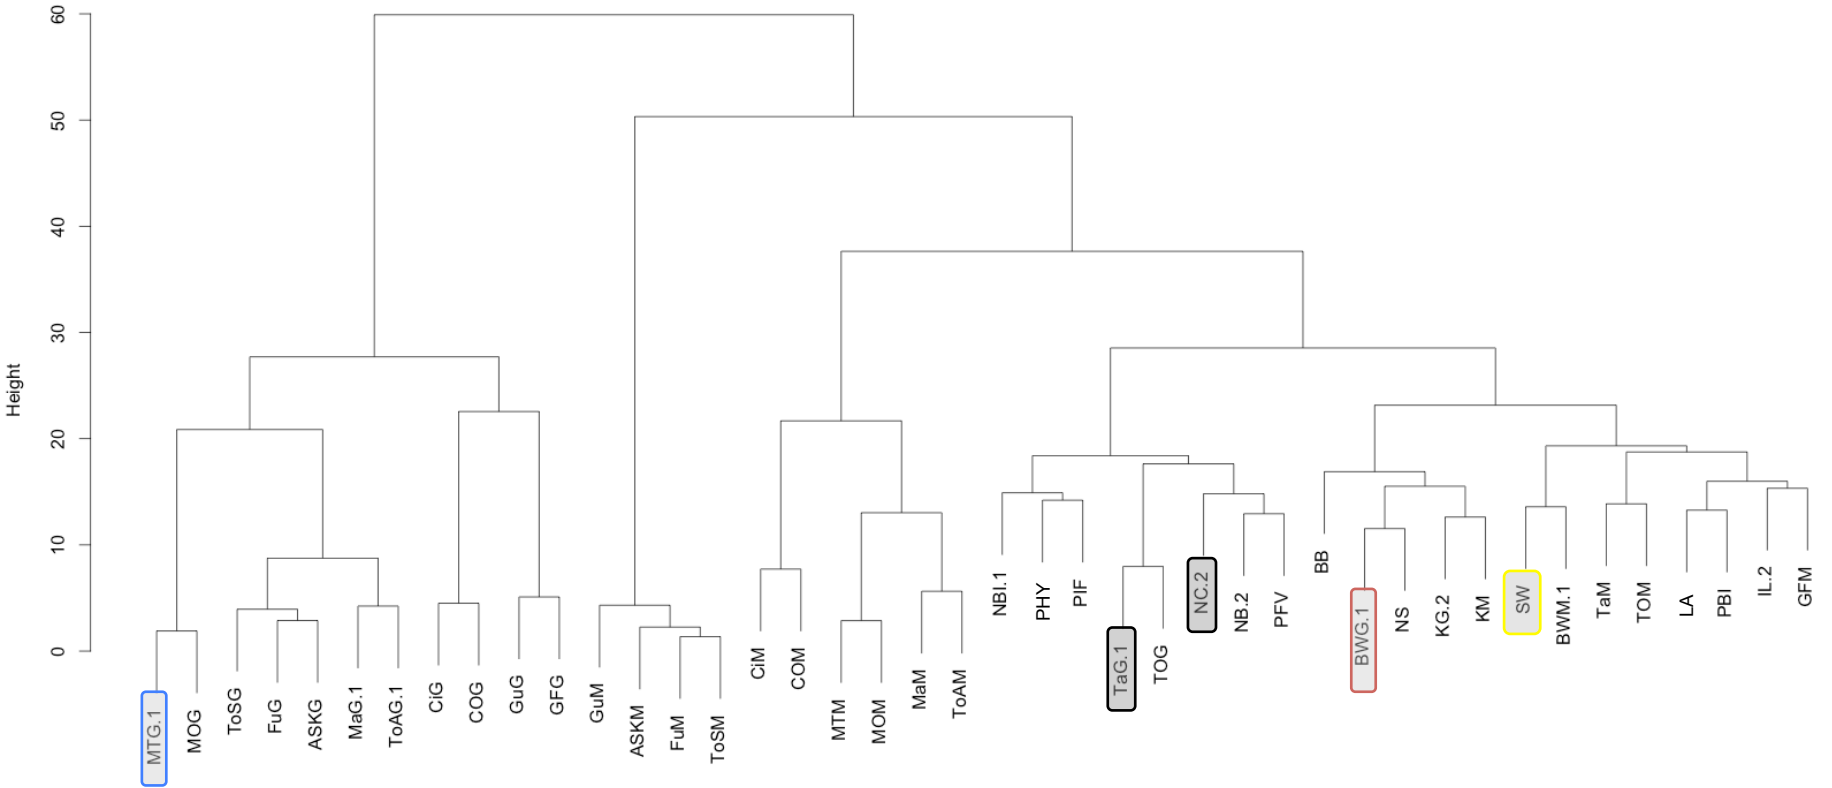

hclust (\*, "ward")

# Hierarchical classification of 2013 outdoors traits

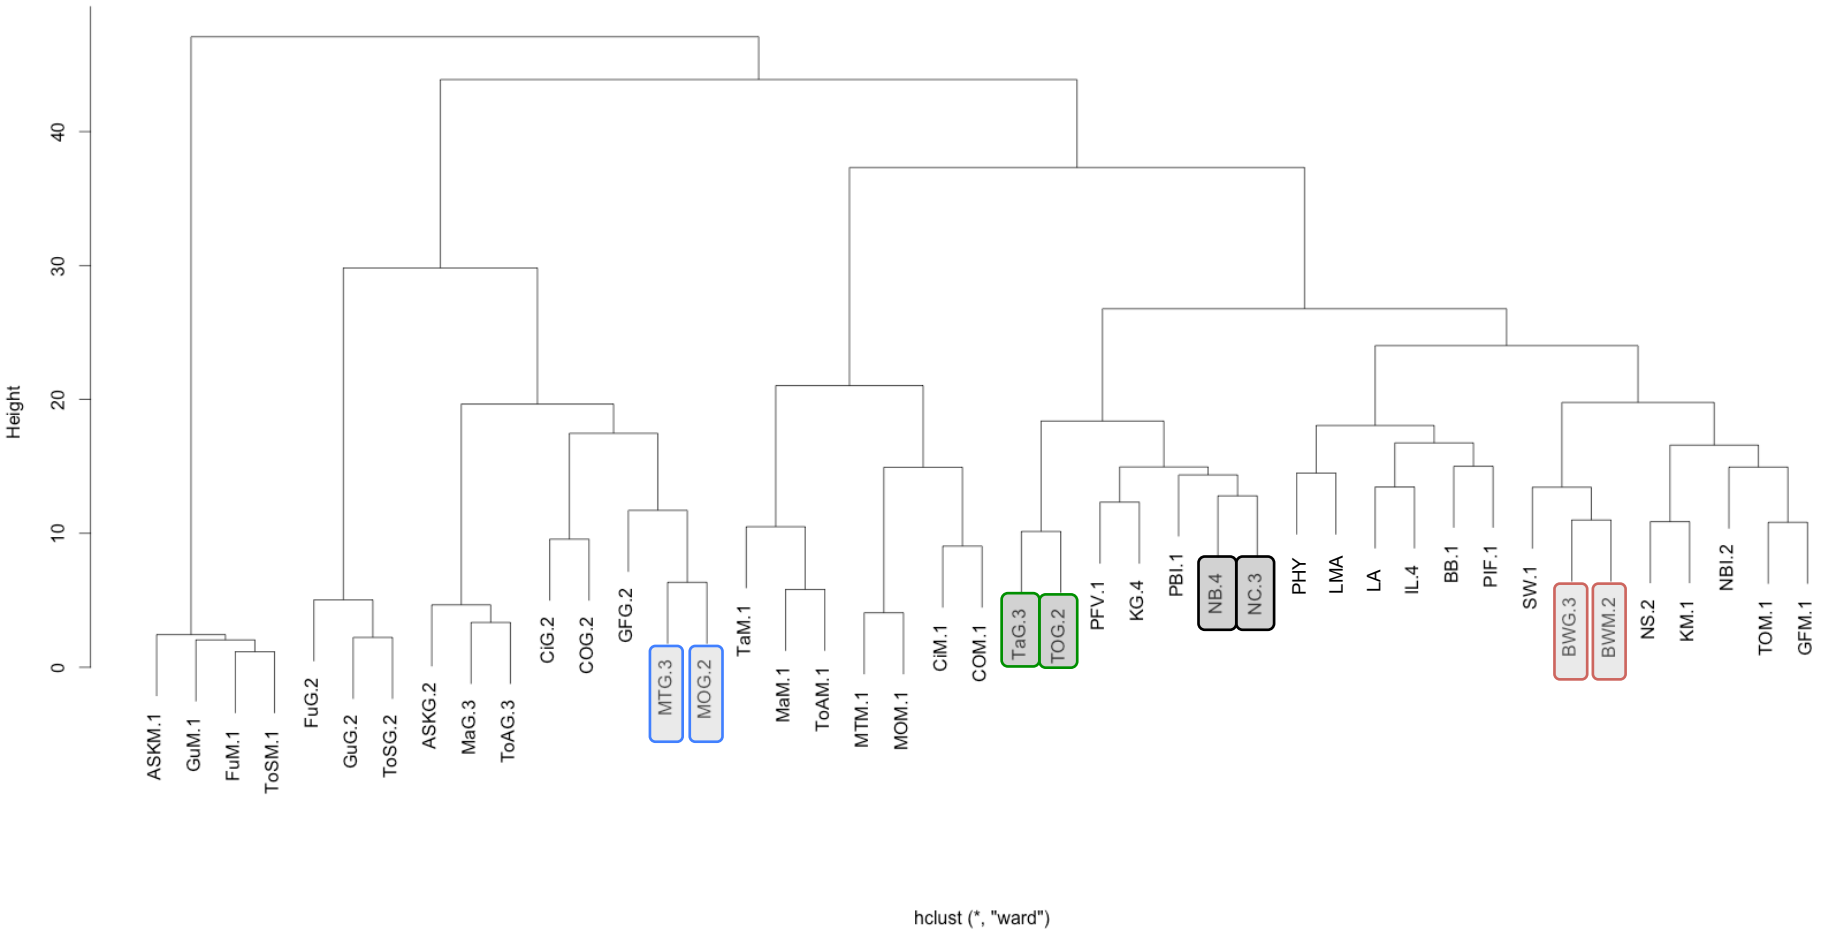

# Hierarchical classification of 2014 outdoors traits

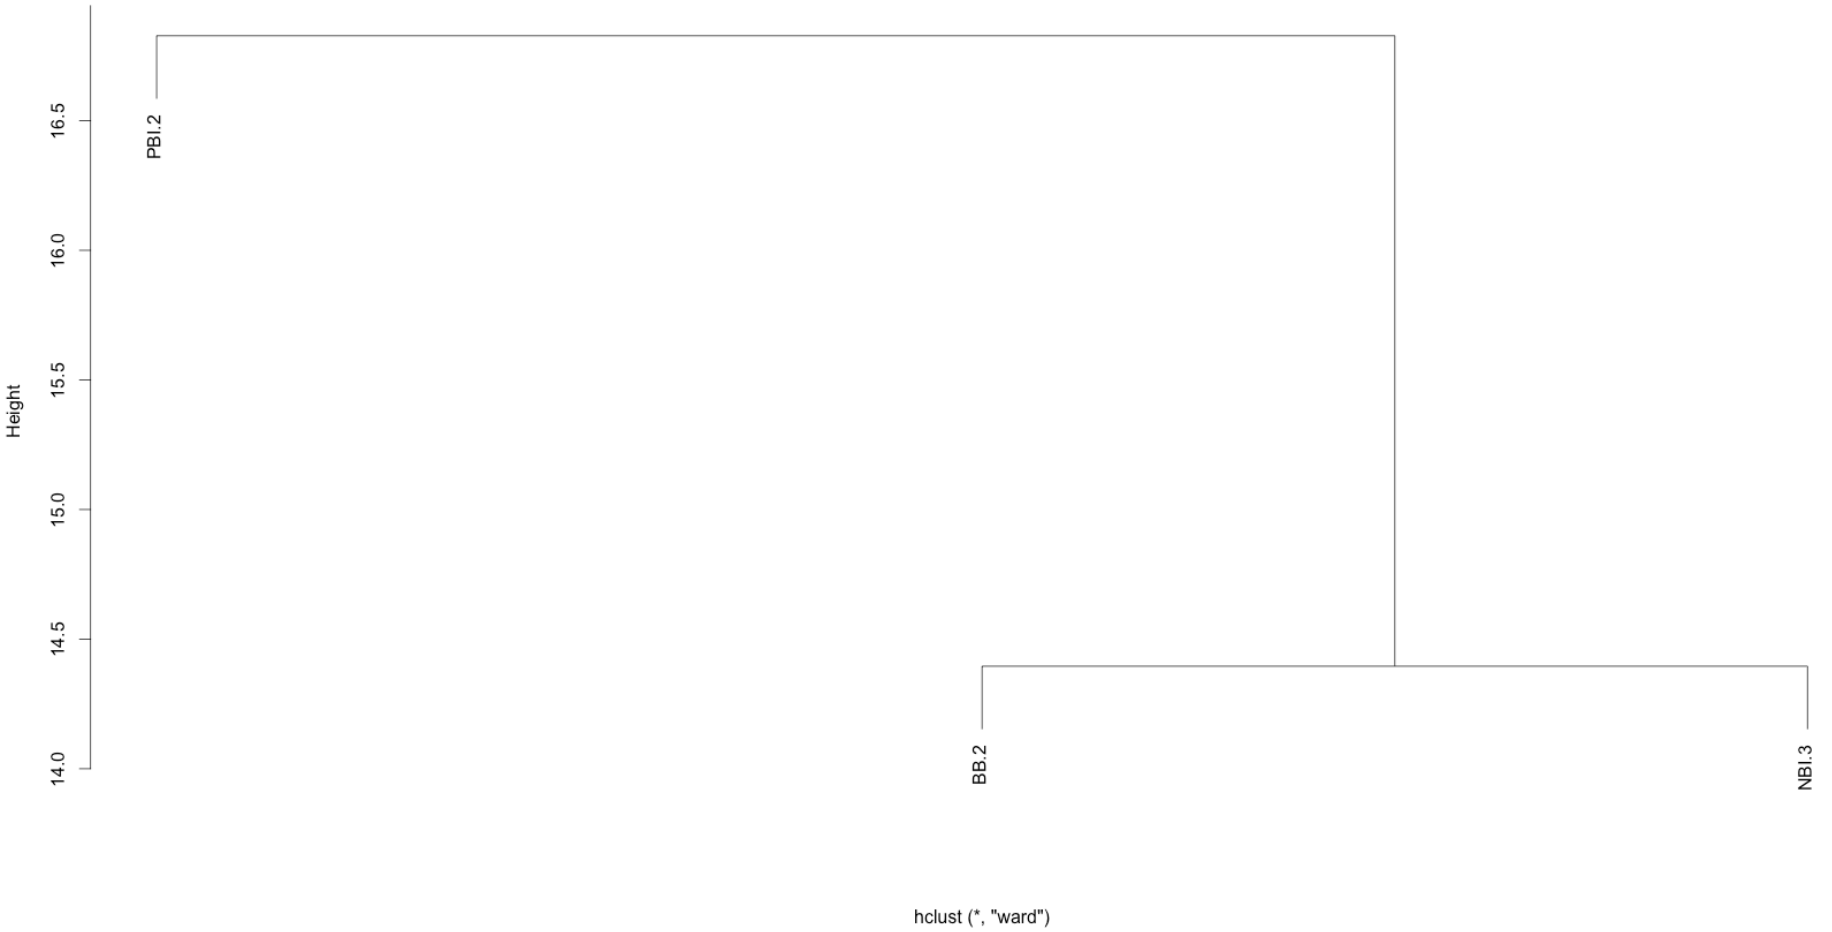

# Hierarchical classification of 2013 cool traits

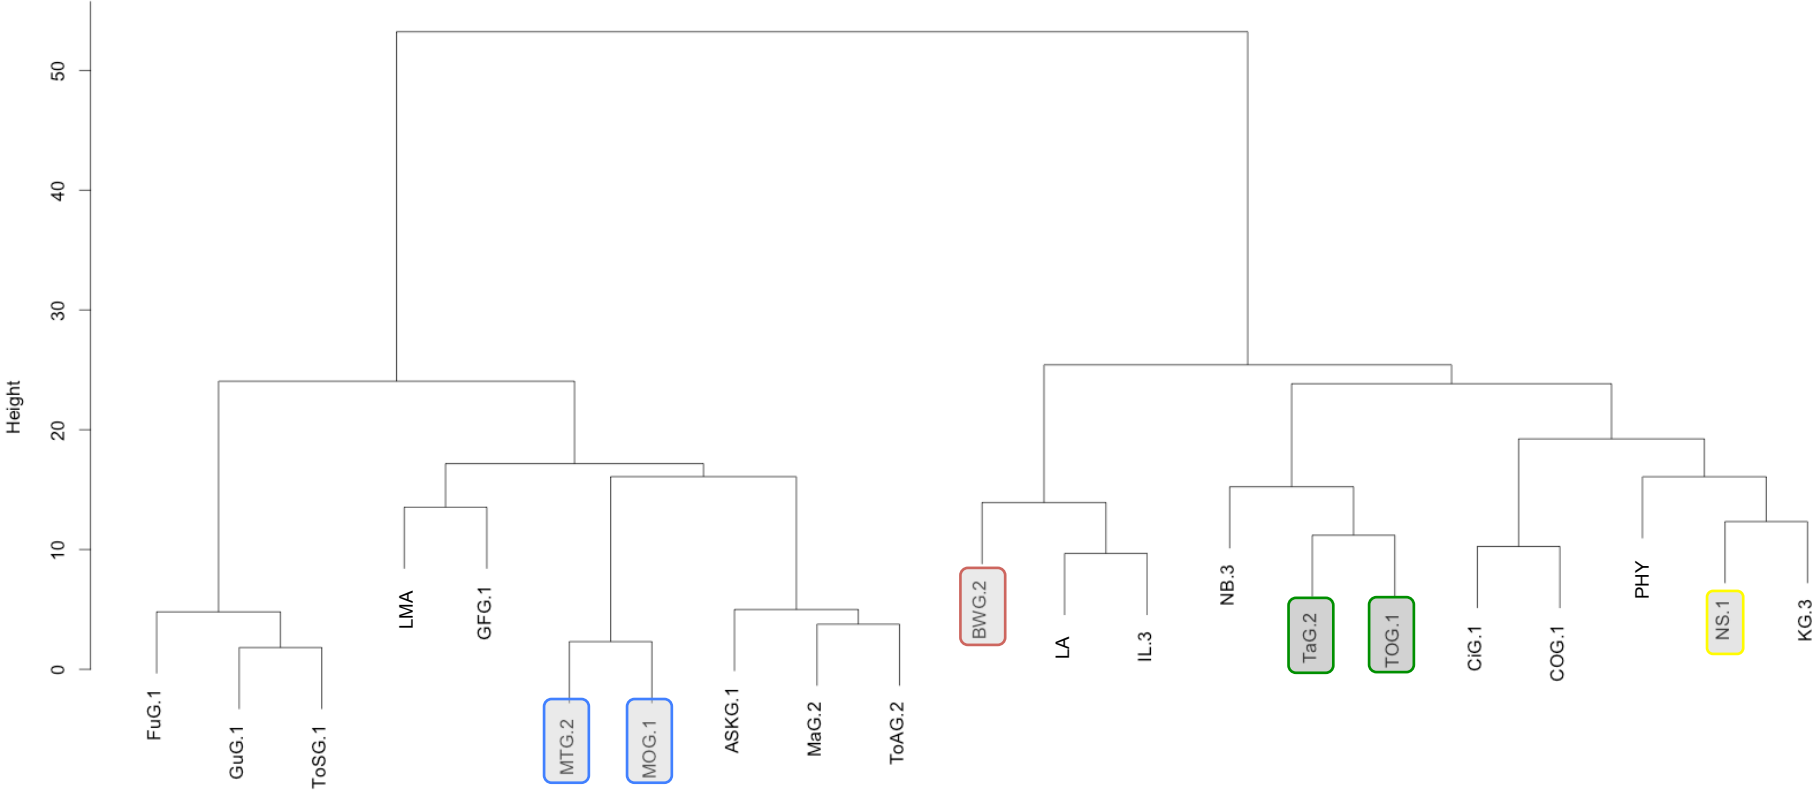

hclust (\*, "ward")

# Hierarchical classification of 2014 cool traits

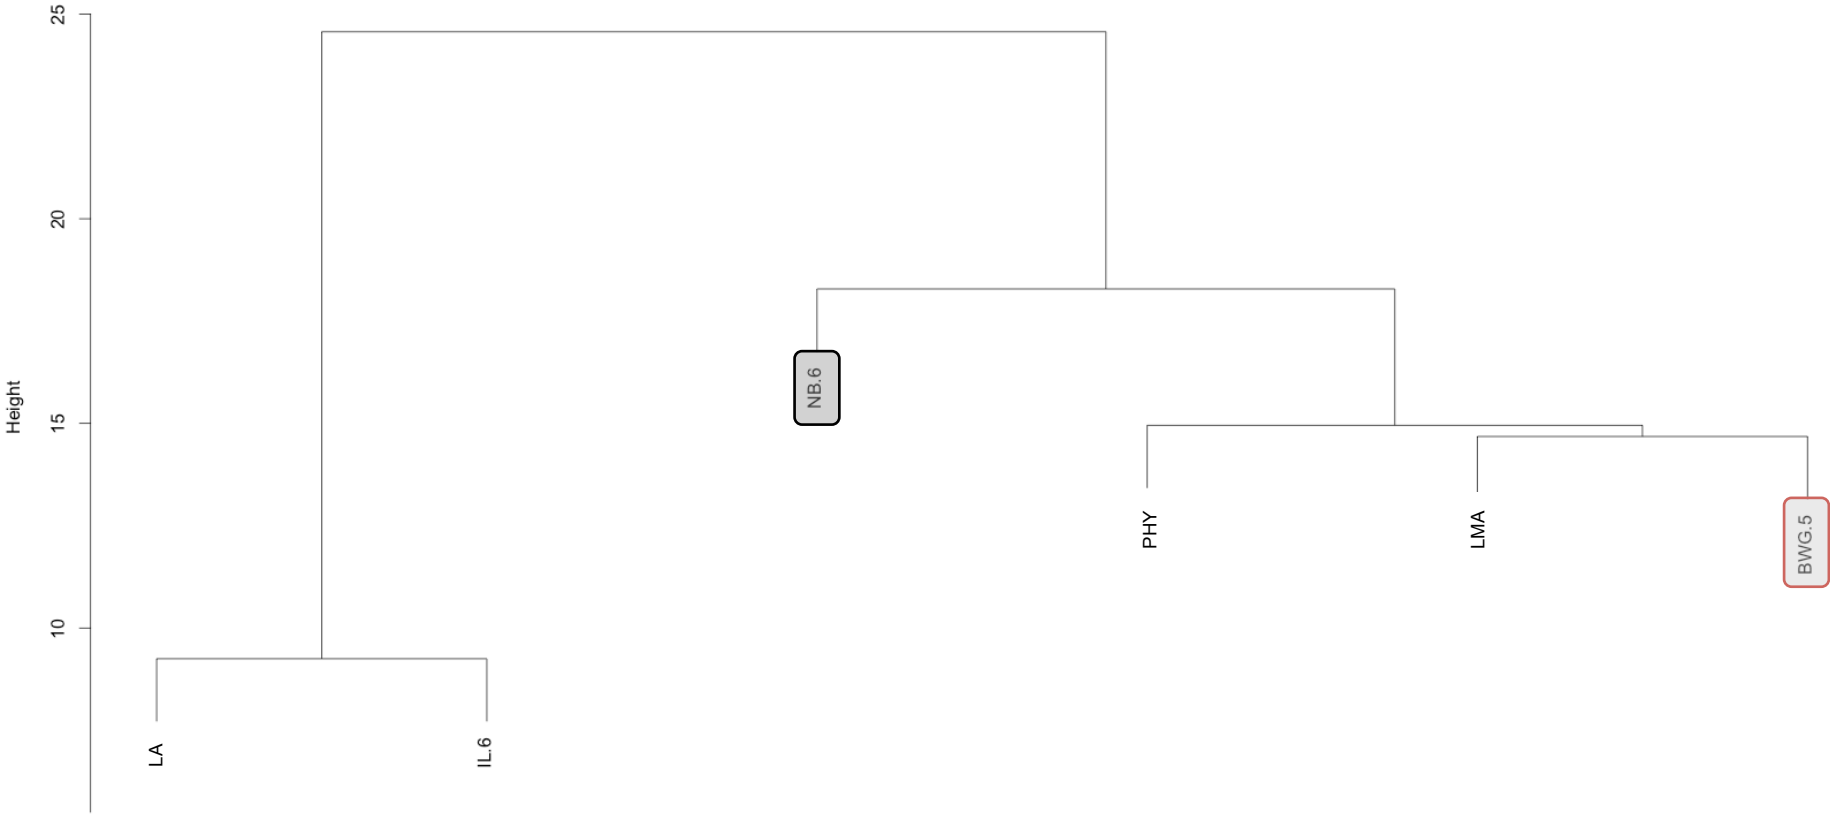

hclust (\*, "ward")

# Hierarchical classification of 2013 hot traits

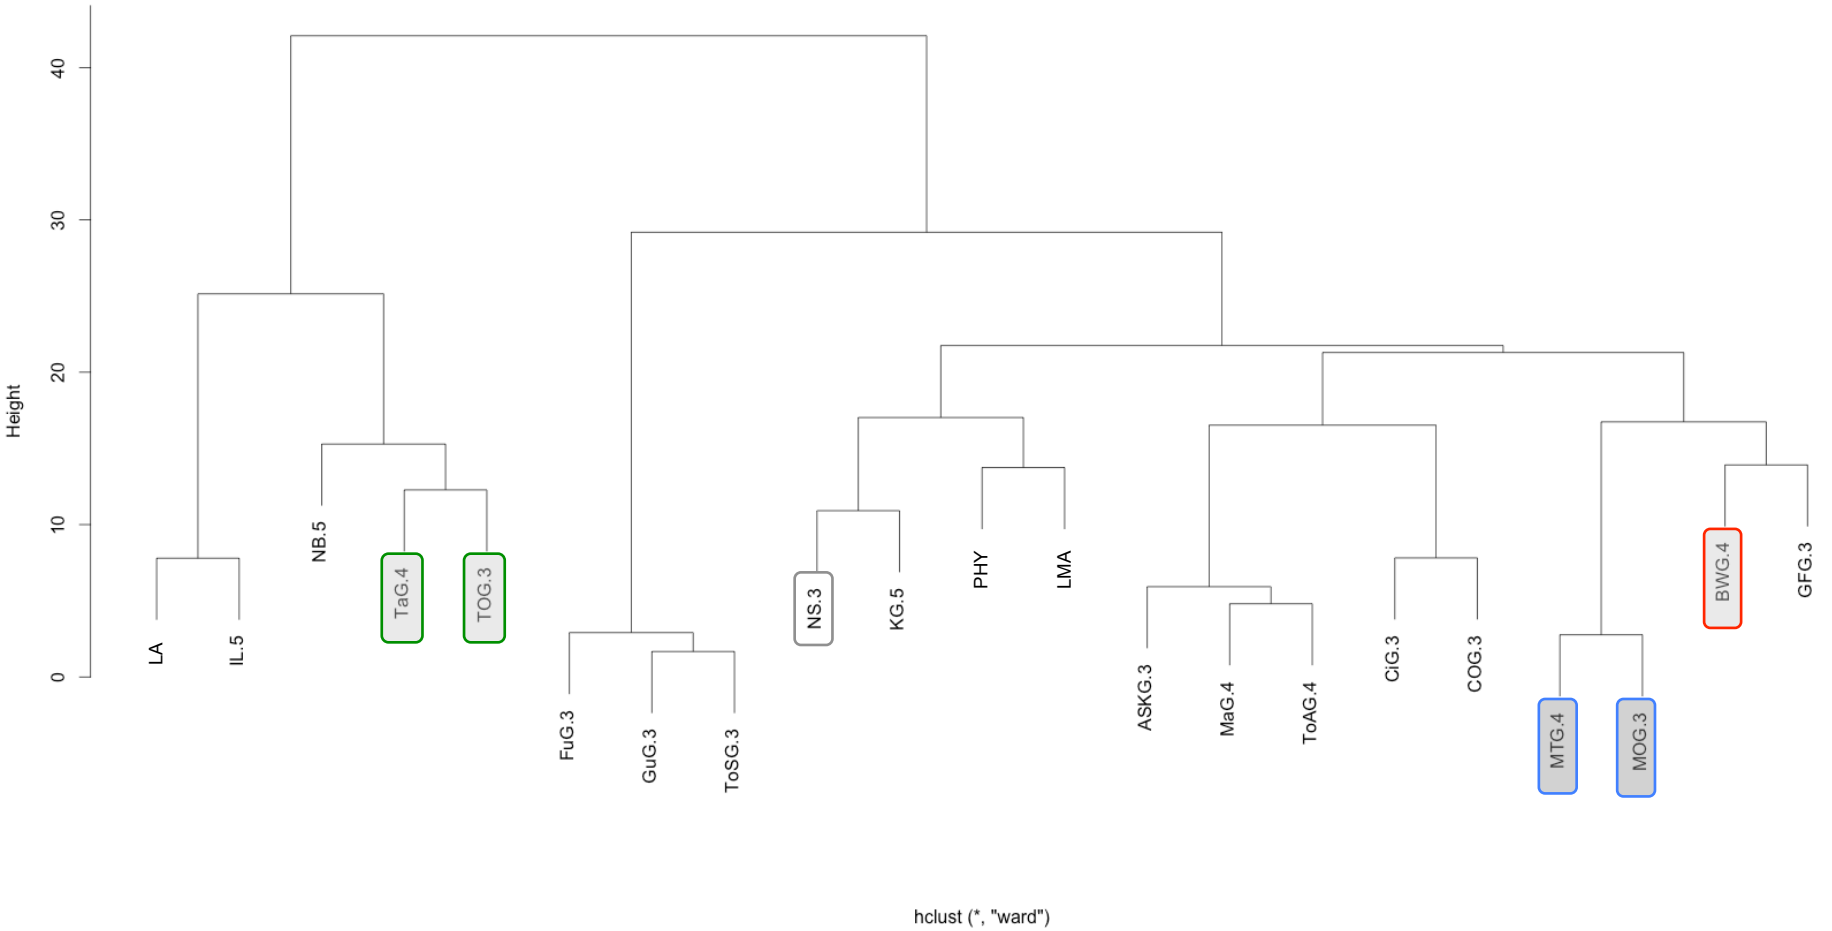



# Hierarchical classification of 2014 hot traits

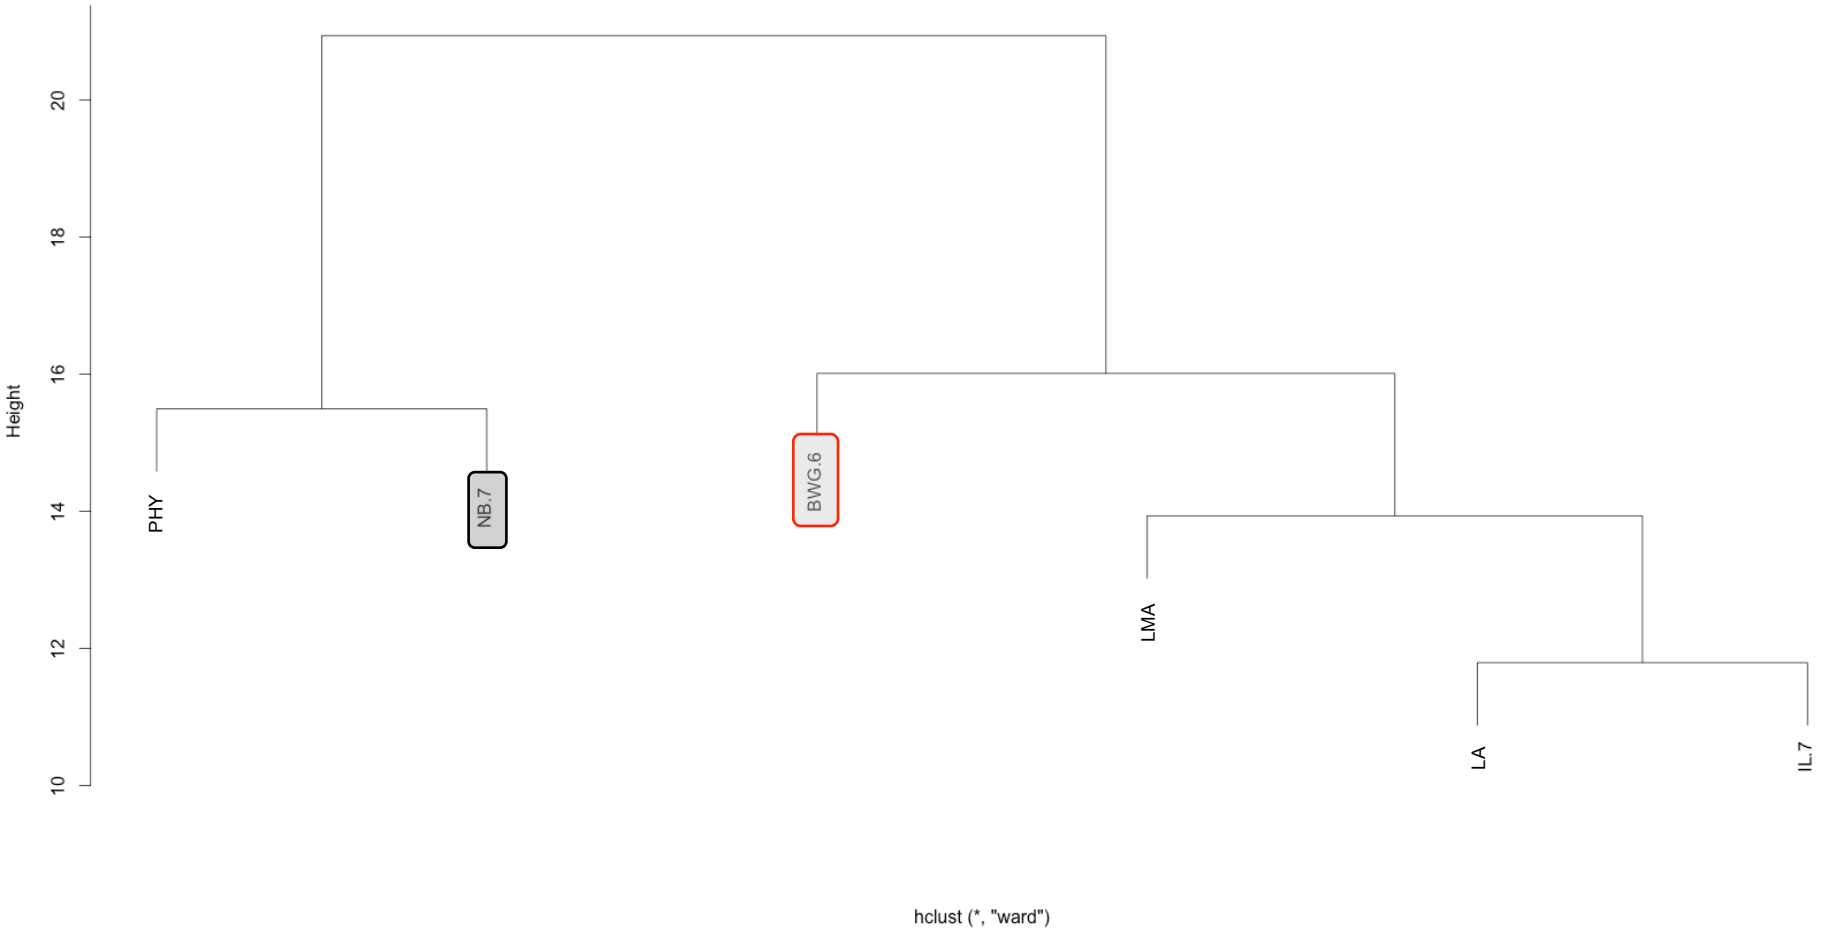

Supplement: 12870_2015_588_MOESM2_ESM.pdf [file 12870_2015_588_MOESM2_ESM.pdf]
