# Supplementary material for: Identification of stable QTLs for vegetative and reproductive traits in the microvine (Vitis vinifera L.) using the 18 K Infinium chip
Source: PubMed Central journal article supplement (PMC4539925; doi:10.1186/s12870-015-0588-0), 2015-08-19

**Figure S3.** Framework parental genetic maps of Picovine and Ugni Blanc *flb* built with SNP markers from the 18K SNP Infinium chip. (A) The Ugni blanc *flb* genetic map. (B) The picovine genetic map.

**A**

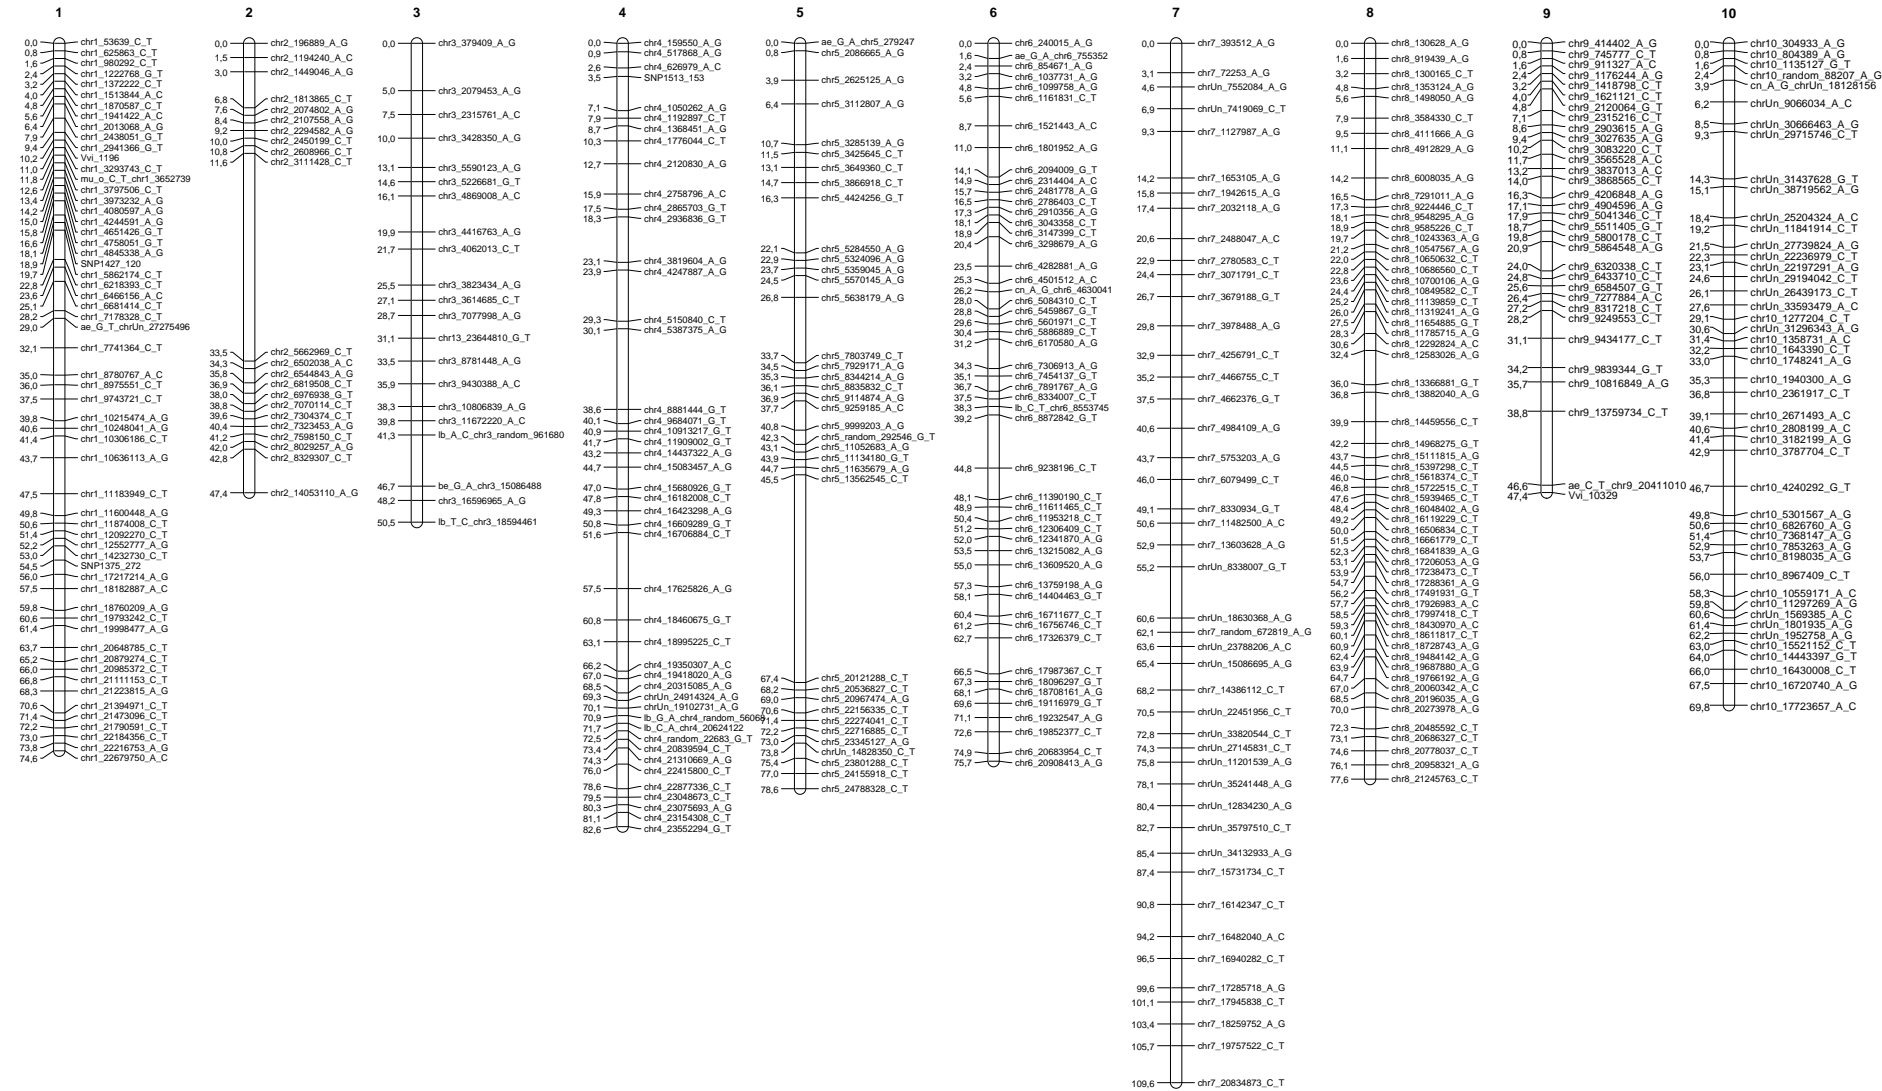

# A

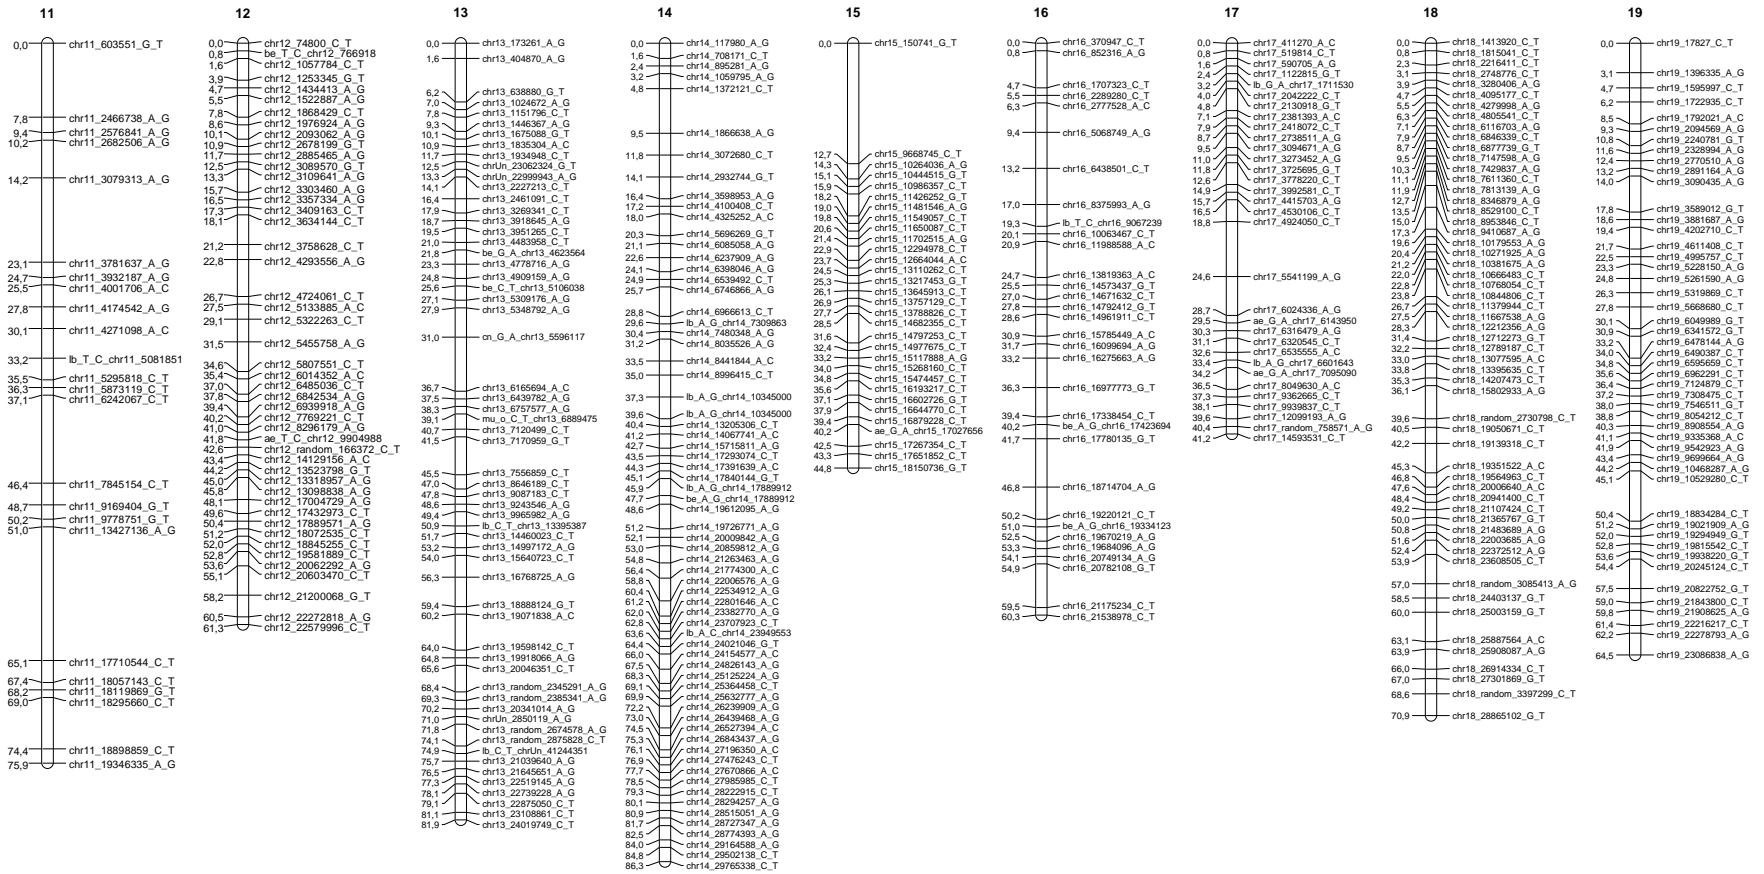

**B**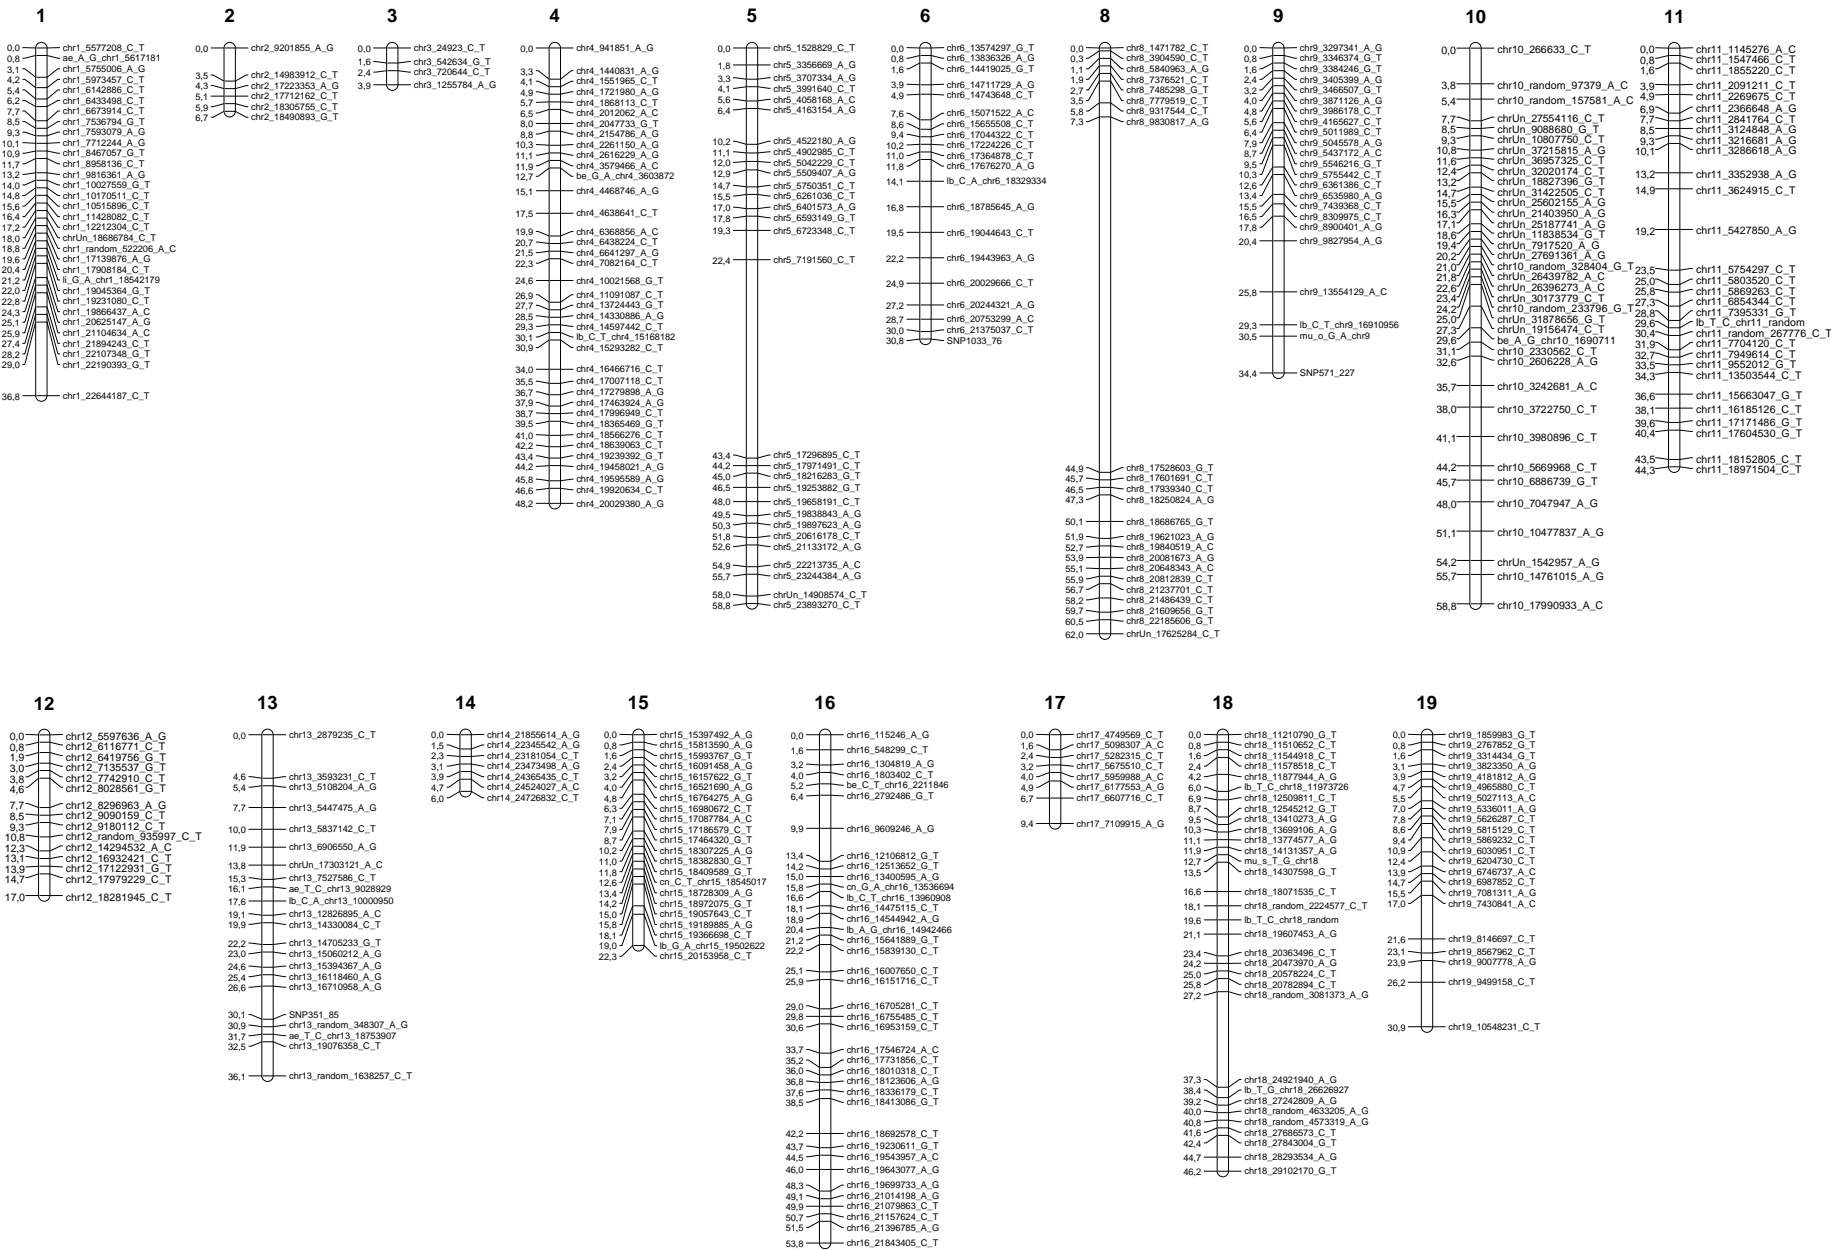

Supplement: 12870_2015_588_MOESM4_ESM.pdf [file 12870_2015_588_MOESM4_ESM.pdf]
