# Supplementary material for: Identification of stable QTLs for vegetative and reproductive traits in the microvine (Vitis vinifera L.) using the 18 K Infinium chip
Source: PubMed Central journal article supplement (PMC4539925; doi:10.1186/s12870-015-0588-0), 2015-08-19

**Figure S4.** SNP positions on genetic maps as a function of their physical position on the reference genome version 12X.2. The maternal parent is the Picovine (blue circles) and the paternal parent is the Ugni Blanc *flb* (pink circles).

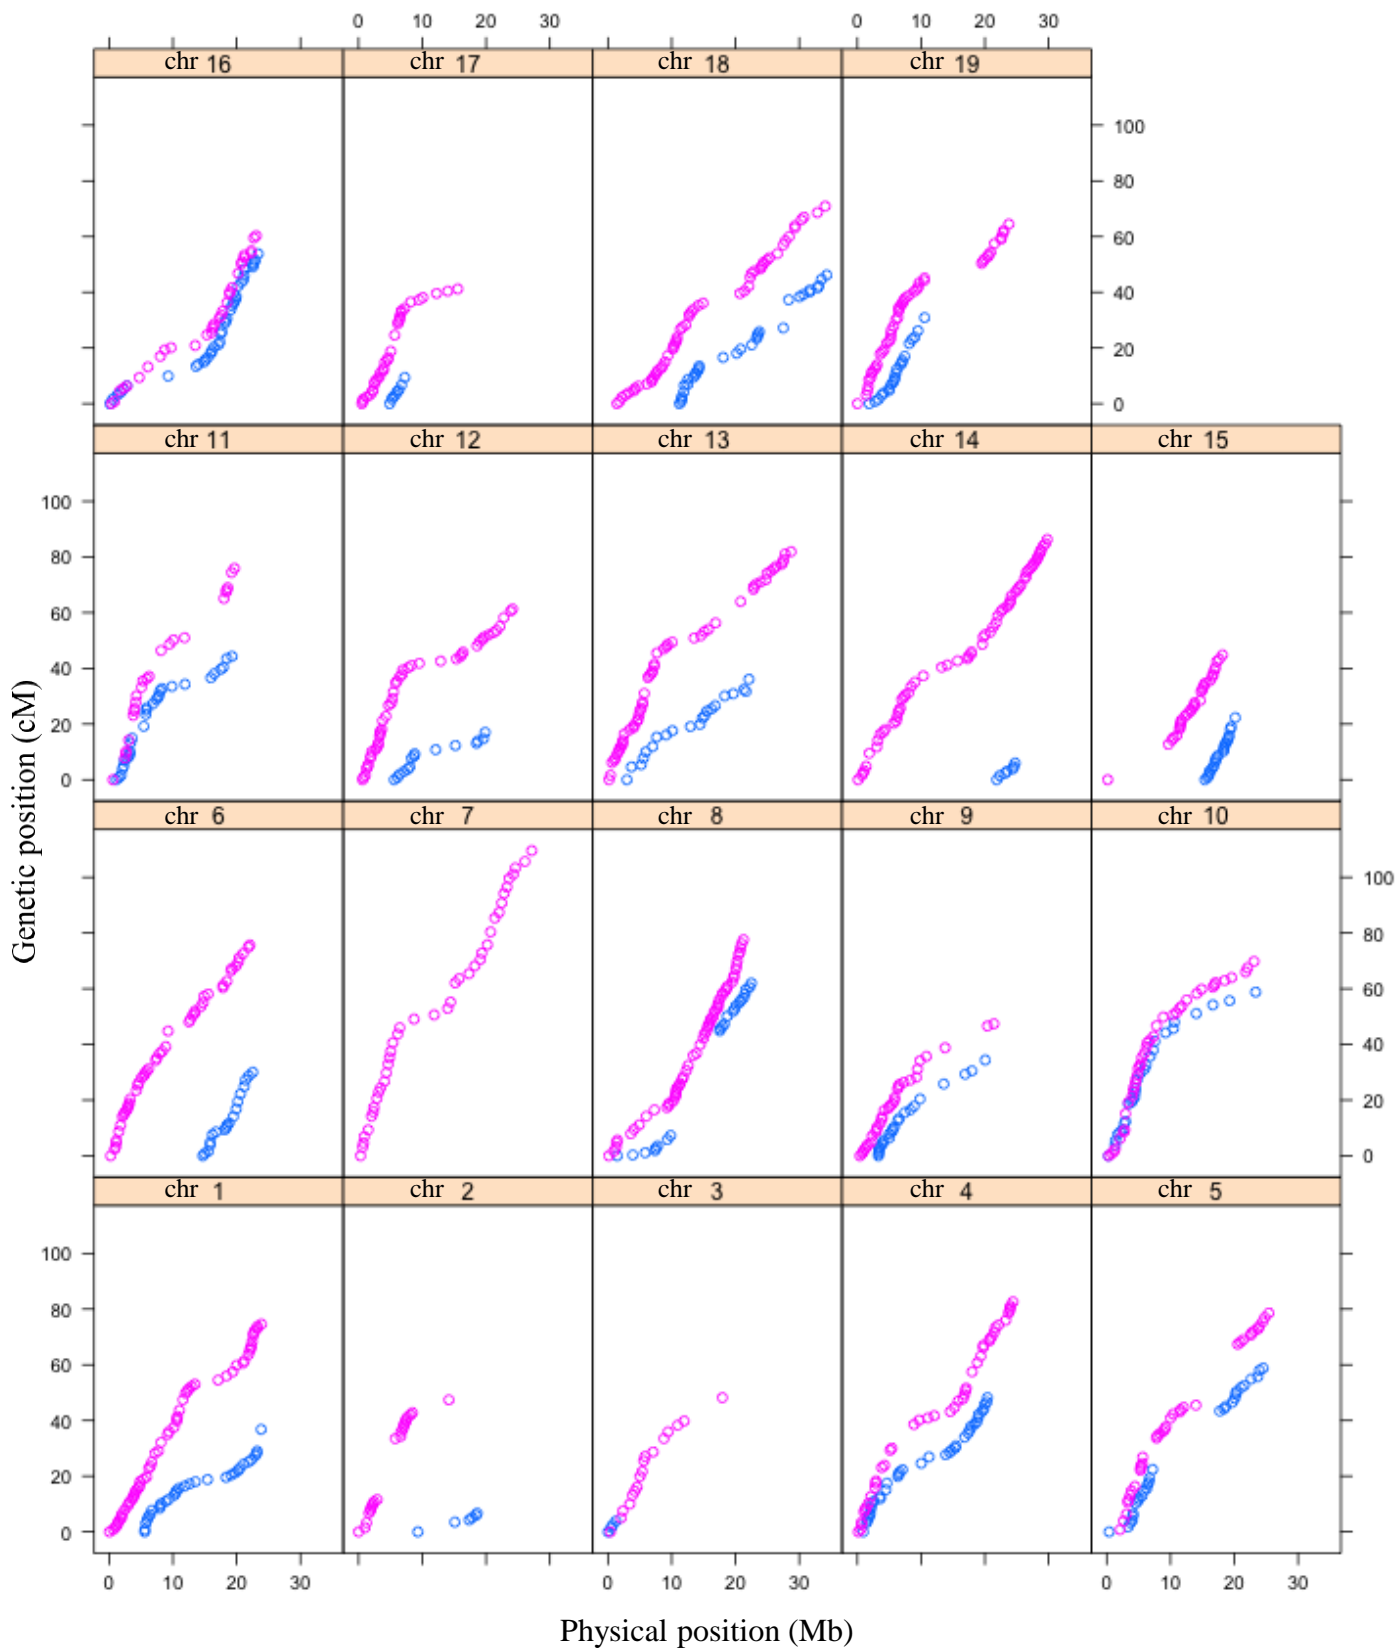

Supplement: 12870_2015_588_MOESM6_ESM.pdf [file 12870_2015_588_MOESM6_ESM.pdf]
